1 **Conserved Metabolic Regulator ArcA Responds to Oxygen Availability, Iron Limitation,**  
2 **and Cell Envelope Perturbations during Bacteremia**

3

4 **Short title: ArcA controls fitness during Gram-negative bacteremia**

5

6 Aric N. Brown<sup>1</sup>, Mark T. Anderson<sup>1</sup>, Sara N. Smith<sup>1</sup>, Michael A. Bachman<sup>1,2</sup>, Harry L. T.

7 Mobley<sup>1\*</sup>

8

9 <sup>1</sup>University of Michigan Medical School Department of Microbiology & Immunology, Ann

10 Arbor, MI USA

11 <sup>2</sup>University of Michigan Medical School Department of Pathology, Ann Arbor, MI USA

12

13 \*Corresponding author: [hmobley@umich.edu](mailto:hmobley@umich.edu)

14 5641 Medical Science Bldg. II

15 1150 West Medical Center Dr.

16 Ann Arbor, Michigan 48109-0620

17 **ABSTRACT**

18           Bacteremia, a systemic infection associated with severe clinical outcomes, is often caused  
19 by Gram-negative facultative anaerobes. ArcAB, a two-component regulatory system that  
20 represses aerobic respiration, is a key mediator of metabolic adaptation for such bacteria. Using  
21 targeted mutational analysis informed by global genetic screens, we identified the *arcA* gene as  
22 promoting fitness of *Klebsiella pneumoniae*, *Citrobacter freundii*, and *Serratia marcescens* but  
23 not *Escherichia coli* in a murine model of bacteremia. Engineered mutants lacking *arcA* exhibit a  
24 dysregulated response to changes in oxygen availability, iron limitation, and membrane  
25 perturbations, all of which bacterial cells experience during infection. The genetic response of the  
26 *arcA* mutants relative to wild-type strains to the cationic antimicrobial peptide polymyxin B  
27 demonstrates an expanded role for ArcA as an activator in response to membrane damage in  
28 addition to metabolic adaptation. ArcA function is furthermore linked to electron transport chain  
29 activity based on its response to uncoupling of proton motive force by carbonyl cyanide-*m*-  
30 chlorophenylhydrazone (CCCP). Differences in lactate and acetate levels as well as lactate  
31 dehydrogenase activity between *arcA* mutant and wild-type cells following CCCP treatment  
32 establish an ArcA-mediated shift to fermentation independent of oxygen availability. This study  
33 highlights the semi-conserved role of ArcA during bacteremia and consolidates infection  
34 phenotypes into a comprehensive model based on respiratory activity.

35 **AUTHOR SUMMARY**

36           Infections of the bloodstream are life-threatening and can result in sepsis, an overreaction  
37 of the host immune system that ultimately damages the body. Gram-negative bacteria are  
38 responsible for causing many cases of bloodstream infections, also referred to as bacteremia. The  
39 long-term goal of our work is to understand how these bacteria establish and maintain infection  
40 during bacteremia. We have previously identified the transcription factor ArcA, which promotes  
41 fermentation in bacteria, as a likely contributor to the growth and survival of bacteria in this  
42 environment. Here, we study ArcA in the Gram-negative species *Citrobacter freundii*, *Klebsiella*  
43 *pneumoniae*, and *Serratia marcescens*. Our findings aid in determining how these bacteria sense  
44 their environment, utilize nutrients, and generate energy while also countering attacks from the  
45 host immune system. This information is critical for developing better models of infection to  
46 inform future therapeutic development.

## 47 INTRODUCTION

48 Metabolic flexibility is an established characteristic of opportunistic bacteria and may be a  
49 prerequisite for transitioning between non-pathogenic and pathogenic environments. Facultatively  
50 anaerobic bacteria are capable of respiration and fermentation and are among the most commonly  
51 isolated pathogens from patients with Gram-negative bacteremia (1,2). However, the factors that  
52 dictate metabolic shifts during different stages of infection, including colonization and  
53 dissemination, are not well understood. *Citrobacter freundii*, *Escherichia coli*, *Klebsiella*  
54 *pneumoniae*, and *Serratia marcescens* cause many community and hospital-acquired cases of  
55 bacteremia (3). Bacteremia is often a precursor to sepsis, the single highest cause of in-hospital  
56 mortality in the United States (4). *E. coli* and *K. pneumoniae* are the two most frequently isolated  
57 pathogens in cases of sepsis while *C. freundii* and *S. marcescens* are emerging bacteremia  
58 pathogens of increasing concern (5–8). The long-term goal of this work is to advance our  
59 understanding of the metabolic and regulatory pathways employed by these Gram-negative  
60 facultative anaerobes within the host bloodstream.

61 Our group has previously utilized transposon mutant libraries and TnSeq to identify critical  
62 fitness genes for *C. freundii*, *E. coli*, *K. pneumoniae*, and *S. marcescens* during bacteremia (9–12).  
63 Genes encoding pathways of central carbon metabolism were among the significant fitness genes  
64 identified and shared between multiple species. Understanding the regulation of these metabolic  
65 pathways is critical for establishing comprehensive models of pathogenesis (13). The TnSeq  
66 results were compared between species to identify shared transcriptional regulators of central  
67 metabolism that contribute to bacterial fitness. Interestingly, interruption of genes encoding the  
68 two-component system ArcAB resulted in a significant loss of fitness for *C. freundii*, *K.*  
69 *pneumoniae*, and *S. marcescens* but not *E. coli*. The response regulator ArcA is a global regulator

70 of metabolism (14) that, together with FNR, IHFA-B, CRP, and Fis, controls the transition between  
71 aerobic and anaerobic conditions in the model system *E. coli* (15). Notably, ArcA was the only  
72 such regulator found to commonly contribute to bacteremia fitness in *C. freundii*, *K. pneumoniae*,  
73 and *S. marcescens*. ArcA has already been shown to be employed by other species including  
74 *Haemophilus influenzae* and *Salmonella enterica* in systemic infections (16,17). The most well-  
75 studied function of ArcA is repression of aerobic respiration pathways, including the citric acid  
76 cycle (18). This regulation is critical for balancing catabolic efficiency (energy production) with  
77 fueling anabolism (biomass growth) (19,20). Along with FNR, ArcA controls more than 80% of  
78 metabolic flux during fermentation and nitrate-mediated respiration (20). ArcA, and its cognate  
79 sensor kinase ArcB, play additional roles in conditions where utilization of available oxygen is  
80 suboptimal or potentially detrimental, such as in response to reactive oxygen species (21). Global  
81 regulators, including ArcA, are able to integrate multiple stimuli to metabolically reprogram the  
82 cell (19,22), and it is likely that several signals in the infection environment may impact ArcA  
83 activity. Here, we investigate the role of ArcA in bacteremia by identifying conditions experienced  
84 in the mammalian bloodstream that require repression of respiration.

85

## 86 **RESULTS**

### 87 **Conservation of ArcA**

88 The conservation of ArcA was assessed across the Order Enterobacterales by mapping  
89 protein sequences to a predicted structure of ArcA from Alpha Fold (23,24) which is informed by  
90 a partially-solved experimental ArcA structure (25). 419 ArcA amino acids sequences (**File S1**)  
91 from 418 species across 8 families were identified in total (**Fig. 1A**), with 150 unique ArcA  
92 sequences remaining after identical sequences were removed. Conservation analysis based on the

93 ArcA structure and phylogeny of the ArcA sequences calculated an average pairwise distance of  
94 0.07, meaning approximately only 7% of residues differ between any two ArcA sequences. On a  
95 scale of 1 to 9, the average conservation level of the 238 residues was 7.7, and more than 75% of  
96 residues scored in the “conserved” range of 6 to 9 (**File S2**). The N-terminal receiver domain of  
97 ArcA was very well conserved when visualized with pyMOL (26) with the greatest variation  
98 observed in alpha helix #2 (**Fig. 1B**). The aspartate residue at the 54<sup>th</sup> position that is  
99 phosphorylated by ArcB in model systems was at the highest level of conservation (27). Between  
100 the receiver domain and the subsequent DNA binding domain is a linker domain, which was one  
101 of the least conserved regions analyzed. In ArcA, the C-terminal domain is a winged helix-turn-  
102 helix (wHTH), which is typical of members of the OmpR family (28). The standard OmpR-like  
103 wHTH secondary structure is organized as  $\alpha_1$ - $\beta_1$ - $\alpha_2$ -turn- $\alpha_3$ - $\beta_2$ - $\beta_3$  and is broadly maintained in this  
104 model of ArcA (29). The OmpR family of wHTH regulators is characterized by an antiparallel  $\beta$ -  
105 sheet upstream of the binding domain which is likely an important determinant of binding  
106 specificity (28). The  $\beta$ -sheet of the ArcA model is interspersed with regions of low conservation,  
107 suggesting that species-based differences in DNA binding specificity may be reflected in this  
108 region. In concordance with the larger sequence comparison, homology of ArcA in representative  
109 clinical strains of *C. freundii*, *E. coli*, *K. pneumoniae*, and *S. marcescens* ranged from 93.70% to  
110 99.58% amino acid identity (**Fig. S1**) (30). Evidence identifying ArcA as largely conserved at the  
111 amino acid sequence and structural level coupled with the previous genetic screens suggesting  
112 *arcA* as supporting pathogenesis prompted the investigation of a shared role during bloodstream  
113 infections.

114

115 **Contribution of *arcA* to fitness in murine bacteremia model**

116 Competition experiments between wild-type and *arcA* mutants (**Table 1**) were conducted  
117 in a murine bacteremia model to assess the contribution of ArcA to bacterial survival and  
118 replication, collectively referred to as fitness. All tested species colonized the liver and spleen 24-  
119 hours post inoculation (**Fig. 2A**) and *S. marcescens* additionally achieved high bacterial burdens  
120 in the kidneys, consistent with our previous findings (31). A significant *arcA*-dependent fitness  
121 defect was observed in the liver and spleen for *C. freundii*, *K. pneumoniae*, and *S. marcescens*  
122 (**Fig. 2B**). The largest fitness defect for *C. freundii* and *K. pneumoniae* was in the liver where *arcA*  
123 cells were outcompeted 6.0-fold and 99.4-fold relative to the isogenic wild-type strain,  
124 respectively. *S. marcescens arcA* mutant was most outcompeted in the kidneys (33.7-fold),  
125 together indicating the magnitude of ArcA's contribution to fitness in this model is organ-and  
126 species-specific. These results validate and confirm our previous TnSeq findings that initially  
127 identified the fitness potential of ArcA among a vast pool of transposon mutants (10–12). No  
128 significant fitness defect was observed for the *E. coli arcA* mutant in either the spleen or the liver,  
129 a notable contrast to the other species. This finding is corroborated by earlier studies in which an  
130 *E. coli arcA* transposon mutant was not associated with a significant fitness defect in spleens by  
131 TnSeq (9,32). Thus, although the ArcA sequence analysis demonstrates a high level of  
132 conservation, the fundamental contribution of *E. coli* ArcA to bacterial fitness during infection  
133 differs substantially from that of *S. marcescens*, *C. freundii*, and *K. pneumoniae*. We therefore  
134 chose to further characterize the *arcA* mutants of *C. freundii*, *K. pneumoniae*, and *S. marcescens*  
135 *in vitro* to explore how ArcA contributes to fitness during bacteremia.

136

**Table 1: Strains Used in Study**

| Species            | Parent Strain | Genotype | Description | Reference             |
|--------------------|---------------|----------|-------------|-----------------------|
| <i>C. freundii</i> | UMH14         |          | wild-type   | Anderson 2018<br>(11) |

|                      |        |                                         |                                                                                       |                                   |
|----------------------|--------|-----------------------------------------|---------------------------------------------------------------------------------------|-----------------------------------|
| <i>C. freundii</i>   | UMH14  | $\Delta arcA$                           | $\Delta arcA::nptII$ knock-out strain                                                 | This study.                       |
| <i>C. freundii</i>   | UMH14  | $\Delta arcA::arcA$                     | chromosomally complemented strain                                                     | This study.                       |
| <i>E. coli</i>       | CFT073 | wild-type                               |                                                                                       | Welch 2002 (33), Mobley 1990 (34) |
| <i>E. coli</i>       | CFT073 | $\Delta arcA$                           | $\Delta arcA::nptII$ knock-out strain                                                 | This study.                       |
| <i>K. pneumoniae</i> | KPPR1  | wild-type                               |                                                                                       | Broberg 2014 (35)                 |
| <i>K. pneumoniae</i> | KPPR1  | $\Delta arcA$                           | $\Delta arcA::nptII$ knock-out strain                                                 | This study.                       |
| <i>K. pneumoniae</i> | KPPR1  | $\Delta arcA$ + pBBR1MCS-5              | <i>arcA</i> knock-out strain with empty vector pBBR1MCS-5                             | This study.                       |
| <i>K. pneumoniae</i> | KPPR1  | $\Delta arcA$ + pBBR1MCS-5+ <i>arcA</i> | $\Delta arcA::nptII$ knock-out strain complemented with pBBR1MCS-5 + <i>arcA</i> gene | This study.                       |
| <i>S. marcescens</i> | UMH9   | wild-type                               |                                                                                       | Anderson 2017 (10)                |
| <i>S. marcescens</i> | UMH9   | $\Delta arcA$                           | $\Delta arcA::nptII$ knock-out strain                                                 | This study.                       |
| <i>S. marcescens</i> | UMH9   | $\Delta arcA::arcA$                     | chromosomally complemented strain                                                     | This study.                       |

137

### 138 *In vitro growth analysis*

139 The ArcB sensor kinase is classically described as a sensor of anaerobiosis,  
140 phosphorylating ArcA under such conditions to optimize growth. *arcA* mutant cells were cultured  
141 alongside wild-type and genetically complemented strains to determine ArcA's influence on  
142 bacterial replication in anaerobic conditions across species (**Fig. 3A**). The difference in generation  
143 times between wild-type and *arcA* mutant constructs was significant for *C. freundii* (73.5 vs 127.1  
144 min.) and *S. marcescens* (113.0 vs 173.0 min.) but more modest for *K. pneumoniae* (59.6 vs 90.0  
145 min.) (**Table 2**) In recent years, ArcAB has been more precisely described as responsive to a  
146 decrease in oxygen consumption (36). To induce a condition in which oxygen utilization is  
147 reduced, cells were cultured aerobically overnight and transferred to a strict anaerobic environment  
148 before subculturing (**Fig. 3B**). Shifted growth curves from this condition revealed a more  
149 substantial delay in the growth of the *K. pneumoniae* and *S. marcescens arcA* mutants compared



150 to the wild-type strains. The *C. freundii*, *K. pneumoniae* and *S. marcescens arcA* mutant strains  
 151 had 57.5, 22.0, and 72.3 min. longer doubling time relative to the respective wild-type strains after  
 152 transition from aerobic to anaerobic conditions (**Table 2**). The average doubling time following  
 153 this transition were very similar to the strict anaerobic condition for *C. freundii* and *K. pneumoniae*  
 154 strains. These values were considerably longer for *S. marcescens* cells, but wild-type cells  
 155 continued to grow faster than the *arcA* mutants. Differences in lag time, or the time to reach  
 156 maximum growth rate, was also calculated ( $\Delta_{LT}$ ) as a metric of the cells' ability to optimize growth  
 157 performance (**Table 3**). The  $\Delta_{LT}$  values for *C. freundii* and *K. pneumoniae* were greater in the  
 158 anaerobic condition, indicating the *arcA* mutant took longer to reach its maximum growth rate  
 159 relative to the wild-type strain. In contrast, the  $\Delta_{LT}$  was 29.4 min. longer in the aerobic to anaerobic  
 160 transition between the *S. marcescens* wild-type and *arcA* mutant strains in comparison to the  
 161 anaerobic condition.

162 **Table 2: Doubling times in LB medium (min.)**

| Genotype                        | Anaerobic   | Aerobic → Anaerobic |
|---------------------------------|-------------|---------------------|
| <b><i>C. freundii</i></b>       |             |                     |
| WT                              | 73.5 ± 5.7  | 72.0 ± 0.7          |
| $\Delta arcA$                   | 127.1 ± 7.3 | 129.5 ± 9.8         |
| $\Delta arcA::arcA$             | 80.8 ± 1.2  | 80.3 ± 2.8          |
| <b><i>K. pneumoniae</i></b>     |             |                     |
| WT                              | 59.6 ± 2.9  | 65.1 ± 4.0          |
| $\Delta arcA + pBBR1MCS-5$      | 90.0 ± 4.6  | 87.0 ± 3.9          |
| $\Delta arcA + pBBR1MCS-5+arcA$ | 67.8 ± 5.9  | 73.2 ± 6.8          |
| <b><i>S. marcescens</i></b>     |             |                     |
| WT                              | 113.0 ± 2.7 | 135.6 ± 16.2        |
| $\Delta arcA$                   | 173.0 ± 7.7 | 207.9 ± 34.0        |
| $\Delta arcA::arcA$             | 111.0 ± 6.9 | 134.7 ± 4.4         |

163

164 **Table 3: Difference in lag times (wild-type vs.  $\Delta arcA$  or  $arcA + eV$  mutant strains) in LB**  
165 **medium (min.)**

| Species              | Anaerobic       | Aerobic $\rightarrow$<br>Anaerobic |
|----------------------|-----------------|------------------------------------|
| <i>C. freundii</i>   | 26.8 $\pm$ 5.8  | 10.0 $\pm$ 8.2                     |
| <i>K. pneumoniae</i> | 83.6 $\pm$ 8.2  | 70.2 $\pm$ 8.2                     |
| <i>S. marcescens</i> | 36.8 $\pm$ 20.9 | 60.2 $\pm$ 25.9                    |

166  
167 Replication of *arcA* mutants was also measured in M9 medium supplemented with glucose  
168 and casamino acids to determine if a carbohydrate carbon source alters *arcA*-dependence. The *C.*  
169 *freundii arcA* mutant exhibited a severe growth defect in the presence of glucose for anaerobic  
170 culture and aerobic to anaerobic transition culture (**Fig. S2**), for which both phenotypes were more  
171 pronounced than in LB medium (**Fig. 3**). Growth defects of the *K. pneumoniae arcA* mutant on  
172 the other hand were very similar in glucose-containing medium to those observed in LB. In the  
173 presence of glucose, all three *S. marcescens* strains displayed a biphasic growth pattern, with the  
174 *arcA* mutant displaying the largest growth defect when bacteria were shifted from aerobic to  
175 anaerobic conditions. Overall, the presence of glucose as an available carbon source did not alter  
176 the requirement for *arcA* in these three species and indeed exacerbated *arcA*-dependent replication  
177 defects for *C. freundii* and *S. marcescens*. The *in vitro* growth kinetics of *arcA* mutants determined  
178 here may in part provide a basis for the observed competitive disadvantage of *arcA* mutants during  
179 infection, considering that both peptide and monosaccharide carbon sources are expected to be  
180 abundant in the host. Furthermore, limited oxygen availability during infection likely plays an  
181 important role in how ArcA modulates metabolism of these three species in the bloodstream and  
182 tissue environments. However, given the complexity of the infection environment, the potential  
183 for ArcA to integrate other relevant signals was also investigated.

184

185 **Growth in iron-limited medium**

186 Iron is a critical cofactor for many metabolic enzymes involved in respiration. Enzymes  
187 including succinate dehydrogenase and NADH:ubiquinone oxidoreductase require iron-sulfur  
188 clusters and are also encoded by operons repressed by ArcA (18,19,37). Free iron levels in the host  
189 are low with most iron being bound to hemoglobin and iron-chelating proteins such as ferritin and  
190 transferrin (38). During infection, levels of freely available iron drop even further as the host  
191 sequesters iron away from the pathogen (39). We hypothesize that ArcA may play a role in  
192 metabolic reprogramming in response to iron limitation. Compared to untreated cultures (**Fig. 4A**),  
193 *arcA* mutants grew more slowly than isotypic wild-type strains when cultured aerobically in LB  
194 supplemented with the non-utilizable iron chelator 2-2'-dipyridyl (**Fig. 4B**). Density at stationary  
195 phase was considerably lower in the *arcA* mutant cultures in comparison to wild-type cultures.  
196 This observation differs from the previous anaerobic experiments where mutant cultures routinely  
197 reached the density of the wild-type cells despite any slower growth rates or extended lag periods.  
198 Importantly, the phenotype further demonstrates a requirement for ArcA in the presence of oxygen.  
199 In all cases, growth kinetics of the three tested species returned to untreated conditions following  
200 supplementation of excess iron to dipyrindyl-containing cultures (**Fig. 4C**). The role of ArcA in  
201 iron-limited environments is further supported by measuring total growth potential of each species  
202 via area under the curve (AUC) in all tested conditions (**Fig. 4D**).

203

#### 204 **Sensitivity to killing by human serum**

205 The cell envelope provides the structural barrier necessary to maintain proton motive force  
206 generated by the electron transport chain during respiration. Through quinones, the electron  
207 transport chain also impacts the kinase activity of ArcB (40,41). ArcA is associated with cell  
208 envelope stress in the context of coordination with other envelope regulators, such as  $\sigma_E$ , and in

209 direct response to envelope damage (42–44). The bactericidal effects of serum largely target the  
210 bacterial envelope (45), and we therefore investigated the role of ArcA in resisting this infection-  
211 relevant envelope stress. Viability of wild-type and *arcA* mutants was quantified in the presence  
212 of pooled human serum as well as heat-inactivated serum. The *C. freundii arcA* mutant was 37.7-  
213 fold more susceptible to killing by intact serum relative to the wild-type strain (**Fig. 5A**), a  
214 phenotype partially complemented in the  $\Delta arcA::arcA$  strain. In contrast, all three *C. freundii*  
215 strains exhibited growth in culture with heat-inactivated serum, but the *arcA* mutant did not grow  
216 as robustly as the wild-type and *arcA* complemented strains. None of the *K. pneumoniae* strains  
217 exhibited reduced viability when cultured with 90% human serum, demonstrating a high level of  
218 serum resistance for this strain (**Fig. 5B**). Interestingly, the wild-type and complemented *arcA*  
219 strain *K. pneumoniae* grew to similar levels in heat-inactivated serum while the *arcA* mutant  
220 showed a significantly reduced ability to replicate in the serum environment. Serum-mediated cell  
221 death was also observed in the *S. marcescens* strains in 40% serum where the *arcA* mutant  
222 experienced a 16.7 times more killing relative to the wild-type strain (**Fig. 5C**). The *S. marcescens*  
223 strains cultured in the heat-inactivated serum experienced net growth rather than killing to similar  
224 levels as the *C. freundii* strains except no statistical difference between wild-type and *arcA* mutant  
225 strains was observed. Disparities in growth between mutant and wild-type strains in heat-  
226 inactivated serum suggests that nutrient limitation or another growth condition inherent to serum  
227 likely contributes to these results. Nevertheless, ArcA contributes to complement resistance for *C.*  
228 *freundii* and *S. marcescens*, demonstrating the link of this response regulator to membrane integrity  
229 for these species.

230

231 **Response to polymyxin B**

232           The host innate immune response includes cationic antimicrobial peptides (CAMPs), such  
233 as cathelicidin LL-37, which permeabilize bacterial cell membranes (46). Polymyxin B (PMB) is  
234 a model CAMP and was used to test whether ArcA also plays a role in the response to CAMP-  
235 mediated cell membrane damage (47,48). PMB treatment of mid-exponential phase cells  
236 demonstrated that *arcA* mutants of all three species were significantly more susceptible to killing  
237 than their isogenic wild-type strain and complemented mutants (**Fig. 6A**). Survival rates were 44-  
238 , 138-, and 76-fold higher in the wild-type strains relative to the *arcA* mutant constructs of *C.*  
239 *freundii*, *K. pneumoniae*, and *S. marcescens*, respectively. These results are especially notable for  
240 *K. pneumoniae* given the lack of *arcA*-dependent serum resistance observed (**Fig. 5B**), thus  
241 supporting the conclusion that ArcA also has a role in responding to *K. pneumoniae* membrane  
242 perturbation similar to *C. freundii* and *S. marcescens*. Together, these data support previous  
243 findings that ArcA regulation of downstream target genes is important for cellular processes that  
244 support envelope health. To investigate further, an ArcA-specific genetic response to polymyxin  
245 B was interrogated.

246           A published transcriptome of *K. pneumoniae* of PMB responsive genes (44) was compared  
247 to an established *E. coli* ArcA regulon (18) to identify putative conserved transcripts controlled by  
248 ArcA in response to PMB. *acs*, *astC*, *fadE*, *feoB*, *lldP*, *putP*, and *ugpB* were selected for this study  
249 based on amino acid identity of at least 80% between *E. coli* CFT073 and *K. pneumoniae* KPPR1.  
250 Gene expression was measured by qRT-PCR in mid-log growth for wild-type, *arcA* mutant, and  
251 complemented *arcA* mutant of *K. pneumoniae* cells following treatment with a sublethal dose of  
252 polymyxin B for 15 minutes. In untreated conditions, every gene except *ugpB* was more highly  
253 expressed in the *arcA* mutant relative to the wild-type strain, confirming the ability of ArcA to  
254 repress these transcripts (**Fig. 6B**). In all cases, genetic complementation reduced transcript levels

255 compared to the *arcA* mutant. Expression of the same genes was then measured in the presence of  
256 polymyxin B. Upregulation of *acs*, *astC*, *fadE*, *feoB*, *lldP*, and *ugpB* was observed relative to  
257 untreated bacteria in the wild-type cells ranging from 2.0-fold to more than 375-fold (**Fig. 6C**). In  
258 contrast, *putP* exhibited minimal polymyxin B induction. The complemented strain yielded largely  
259 similar results to wild-type except for *feoB* and *lldP* in which an intermediate phenotype was noted.  
260 Relative expression of *acs* and *fadE* were 30.8 and 3.5 times lower in the *arcA* mutant cells in  
261 comparison to wild-type levels yet were still upregulated. Expression levels compared to wildtype  
262 were lower for *astC* (3.0 logs), *feoB* (0.9 logs), *lldP* (2.3 logs), and *putP* (1.2 logs) in the *arcA*  
263 mutant, and these genes were ultimately downregulated following polymyxin B treatment. In  
264 summary, ArcA is largely a repressor of the tested genes in untreated conditions but clearly serves  
265 as an activator or mediates de-repression in response to polymyxin B-induced stress.

266         Given the evidence for ArcA-dependent regulation of the *K. pneumoniae* polymyxin B-  
267 induced transcripts, the potential for proximal ArcA binding sites was explored. ArcA binding  
268 sequences with two to four direct repeats have been reported for the seven genes of interest in *E.*  
269 *coli* (18). A homologous sequence was identified in six of the seven genes in *K. pneumoniae* (**Fig.**  
270 **6D**). Coordinates of the direct repeats in the *E. coli* ArcA-binding sequences were then mapped  
271 onto the *K. pneumoniae* sequences. The spacing of ArcA binding capabilities was hypothesized  
272 remain the same based on the high conservation of ArcA's structure. Remarkably, most of the  
273 nucleotide differences between the *E. coli* and *K. pneumoniae* sequences were outside of the direct  
274 repeats, suggesting a pressure for conservation of the direct repeats. Putative ArcA binding  
275 sequences were also readily identifiable in many of the same genes of *C. freundii* and *S.*  
276 *marcescens* (**Fig. S3**). The polymyxin B survival assay, expression data, and identification of  
277 putative ArcA binding sites in the promoters of polymyxin B-responsive genes all provide

278 evidence for a direct role of ArcA in responding to CAMPs, further emphasizing the function of  
279 ArcA in the infection environment.

280

### 281 **ArcA responds to electron transport chain perturbations to promote fermentation.**

282 ArcA represses pathways that ultimately provide the electron transport chain (ETC) with  
283 electron carriers such as NADH for chemiosmotic-based ATP production (18,49). The ability of  
284 the ETC to maintain a proton gradient across the inner membrane can be compromised when the  
285 cell envelope is damaged. Thus, ArcA is hypothesized to repress pathways that fuel the ETC in *C.*  
286 *freundii*, *K. pneumoniae*, and *S. marcescens* when proton motive force (PMF) cannot be  
287 maintained despite the availability of electron donors and a terminal electron acceptor. The PMF  
288 uncoupler carbonylcyanide-*m*-chlorophenylhydrazone (CCCP) was utilized to probe the cell's  
289 ability to respond to inhibition of ATP production via chemiosmosis. Wild-type, *arcA* mutant, and  
290 complemented strains were cultured aerobically in a minimal medium containing glucose with and  
291 without CCCP to test this hypothesis (**Fig. 7A-B**). The differences in growth patterns during CCCP  
292 treatment varied by species but can be broadly characterized as detrimental. The *arcA* mutants of  
293 *C. freundii*, *K. pneumoniae*, and *S. marcescens* had increased lag times of 8.0 h., 4.2 h., and 8.3 h.  
294 and 25.2 min., 32.1 min., and 18.7 min. longer doubling times relative to the wild-type strains,  
295 respectively.

296 The ability to grow in CCCP is expected to require an ETC-independent mechanism for  
297 ATP production, such as fermentation. ArcA mediates the transition to fermentation (50), so *arcA*  
298 mutant bacteria were hypothesized to experience defects in mixed acid fermentative processes in  
299 response PMF uncoupling (51–54). LC-MS was utilized to quantify acetate (**Fig. S4**) in the  
300 supernatant of untreated and CCCP-treated cultures (**Fig. S5**) as one readout of fermentation.

301 Acetate levels decreased in wild-type *C. freundii* 6.2-fold but were 1.5 times higher in the  
302 corresponding *arcA* strain relative to untreated conditions (**Fig. 7C**). In the *K. pneumoniae* and *S.*  
303 *marcescens* wild-type and *arcA* strains, acetate levels were 1.4 to 2.2-fold higher in CCCP-treated  
304 conditions (**Fig. 7C**), signifying fermentation was induced in these cultures. D-lactate  
305 dehydrogenase levels (LDH) in the CCCP cultures were also measured as an additional metric of  
306 fermentation (**Fig. 7D**). LDH activity significantly increased in the *C. freundii* wild-type (13.5-  
307 fold) and *arcA* mutant (30.3-fold) strains cultured with CCCP relative to untreated conditions,  
308 indicating CCCP induced fermentation, but ArcA activity may play an inhibitory role of LDH in  
309 this case. Relative LDH levels also increased in wild-type *K. pneumoniae* (13.2-fold) and *S.*  
310 *marcescens* (2.8-fold) cultures containing CCCP, and importantly, the increase in LDH activity  
311 was dependent on ArcA for *K. pneumoniae* and partially so for *S. marcescens*. The relationship  
312 between cellular LDH levels and supernatant lactate concentration in the context of CCCP and  
313 ArcA was assessed by quantifying lactate by LC-MS. The concentration of lactate increased 20.7-  
314 fold in the wild-type *C. freundii* in response to CCCP, but this phenotype was variable and was  
315 not observed in the *arcA* mutant strain (**Fig. 7E**). Almost no difference in lactate was found  
316 between the wild-type *K. pneumoniae* cultures whereas the *K. pneumoniae arcA* mutant CCCP  
317 culture yielded 2 logs more lactate than the untreated culture. A similar trend was observed for *S.*  
318 *marcescens* in which lactate levels did not change between CCCP and untreated wild-type strain  
319 cultures but almost tripled for the *arcA* mutant strain (**Fig. 7E**). Lactate levels have previously  
320 been shown to increase in the supernatant of *arcA* mutant cultures under anaerobic conditions  
321 (55,56), indicating our findings for *K. pneumoniae* and *S. marcescens* matched other fermentative  
322 conditions. The inverse correlation of higher LDH levels in wild-type cells to lower lactate  
323 concentrations for *K. pneumoniae* and *S. marcescens*, however, are not clear but may potentially



324 be explained by an unknown effect of CCCP treatment or oxidation of lactate at the transport chain  
325 (57).

326

## 327 **DISCUSSION**

328 The two-component response regulator ArcA is highly conserved among Enterobacterales  
329 species and mediated metabolic adaptation under low oxygen levels in *C. freundii*, *K. pneumoniae*,  
330 and *S. marcescens*. We demonstrate for the first time that ArcA promotes fitness of all three species  
331 during bacteremia. *arcA* mutants exhibited a dysregulated response to changes in oxygen and iron  
332 availability, which are conditions that are likely to be encountered during infection. ArcA was  
333 found to be part of the response to membrane damage caused by the CAMP polymyxin B,  
334 demonstrating an expanded role for ArcA that is perhaps linked to disruption of ETC activity.  
335 ArcA mediated a shift to fermentation in response to PMF disruption, independent of oxygen  
336 availability, as measured by LDH activity. The proposed model detailing ArcA's response to low  
337 oxygen, limited iron, and membrane damage is summarized in **Fig. 8**.

338 Bacteria entering the bloodstream from the environment or from another infection site such as  
339 the lungs during pneumonia can be hypothesized to experience increasingly anaerobic conditions  
340 during dissemination. Ambient oxygen levels are at approximately 21.1%, and the percentage of  
341 oxygen in the host decreases to 13.2% in arterial blood to 5.4% in the liver (58). Very little oxygen  
342 is dissolved in bloodstream as 98% is bound to hemoglobin (59). A published study from our group  
343 has demonstrated the average population doubling time of *C. freundii*, *K. pneumoniae*, and *S.*  
344 *marcescens* in the murine spleen during bacteremia are 66, 39, and 61 minutes, respectively (31).  
345 The ability of the bacterial cells to maintain rapid replication rates is thus hypothesized to be an  
346 important factor in combating host clearance mechanisms and establishing infection during

347 bacteremia. It is notable that the *in vitro* growth defects observed in this study for the *K.*  
348 *pneumoniae* and *S. marcescens arcA* mutants were evident by a sizeable shift in growth curves in  
349 the aerobic to anaerobic transition. These results capture ArcA's role in responding to a change in  
350 oxygen utilization and showcase ArcA's likely support of the metabolism needed in the host  
351 environment to maintain rapid growth. Of note, our research group has previously shown that  
352 during urinary tract infections, *E. coli* relies on the TCA cycle with glycolysis being dispensable  
353 (60,61). If *E. coli* favors the same pathways during bacteremia, ArcA would be expendable in its  
354 role as a repressor of the TCA cycle, which explains the lack of fitness defect associated with  
355 mutating *arcA* in the *E. coli* bacteremia model. The requirement of ArcA for the other species  
356 suggests other metabolic pathways are likely preferred during infection. Indeed, our previous  
357 TnSeq screens identified genes encoding 6-phosphofructokinase, phosphate acetyltransferase, and  
358 acetate kinase as contributing to fitness for *C. freundii* and *S. marcescens*, suggesting glycolysis  
359 and fermentation are required by these species during infection (10,11).

360 This work establishes that ArcA is needed to maximize replication of *C. freundii*, *K.*  
361 *pneumoniae*, and *S. marcescens* in iron-limited conditions. ArcA has previously been shown to  
362 contribute to iron homeostasis in conjunction with FNR and Fur in *E. coli* (62). The decrease in  
363 growth *arcA* mutants observed here occurred under ambient oxygen conditions, bolstering the  
364 notion that ArcA responds to utilization of oxygen as a terminal electron acceptor rather than the  
365 absence of oxygen. Fermentation has indeed already been shown to be the preferred metabolic  
366 pathway during iron starvation (37,63). Chareyre *et al.* demonstrated that when facing iron  
367 starvation, *E. coli* shuts down respiratory complexes via the small RNA RhyB. RhyB post-  
368 transcriptionally controls the *nuo* and *sdh* operons which encode these complexes. The *nuo* and  
369 *sdh* operons are well established as being among the genetic elements most strongly repressed by

370 ArcA (18,19). Future studies may examine the potential for coordination between RhyB and ArcA  
371 to further our understanding of repression of respiration in the context of iron limitation. This link  
372 between iron and oxygen availability appears to be intrinsic to life. Hypoxia Inducible Factor (HIF)  
373 in humans is a transcriptional activator induced by low levels of systemic oxygen availability (64).  
374 Similarly to ArcA, HIF has also been shown to become active in low iron conditions and promote  
375 glycolytic activity (65,66).

376 Increased sensitivity *C. freundii* and *S. marcescens arcA* mutants to human serum and a lack  
377 of growth for *arcA K. pneumoniae* in heat-inactivated human serum are indications ArcA mediates  
378 survival in the bloodstream environment. The studies here are the first to our knowledge to  
379 demonstrate bacteria lacking *arcA* are more sensitive to CAMPs. Six genes upregulated by ArcA  
380 were identified in *K. pneumoniae* following PMB treatment, which was unexpected given ArcA's  
381 well established role in repressing all of the genes except *feoB* (18–20). There is precedence,  
382 however, for the ability of ArcA to upregulate and downregulate the same gene(s) depending on  
383 growth conditions (67). More work is needed to determine if ArcA directly or indirectly  
384 upregulates the genes responsive to PMB. Interestingly, *acs*, *lldP*, and *putP* are upregulated in an  
385 *arcA* avian pathogenic *E. coli* strain grown in duck serum relative to the isogenic wild-type strain  
386 where membrane stressors are also likely present (68). None of the seven genes studied in the  
387 context of PMB are directly involved with major systems of aerobic respiration. A “core” ArcA  
388 regulon may exist in which ArcA repression of central carbon metabolic pathways is invariable  
389 alongside a “conditional” regulon in which ArcA's role as an activator or repressor is context  
390 dependent. More transcriptomic and DNA footprinting studies will be critical for defining the  
391 direct and indirect ArcA regulons for more species in infection-relevant conditions.

392 CAMPs such as PMB can damage the inner membrane and inhibits respiratory enzymes

393 (69,70), implying PMB can disrupt maintenance of PMF or damage the ETC itself. In our studies,  
394 CCCP was used to directly target ETC function. *arcA* mutants grew more slowly in the presence  
395 of CCCP, connecting ArcA to disruptions of ETC activity. CCCP induced an increase in LDH  
396 levels in all three species, which was indicative of a shift to fermentation, and this increase was at  
397 least partially ArcA-dependent for *K. pneumoniae* and *S. marcescens*. Targeted metabolomics  
398 revealed lactate and acetate levels in a medium with CCCP are ArcA-and species-dependent.  
399 Acetate and lactate pathways contribute to the maintenance redox balance during glycolysis (54).  
400 Based on ArcA's multiple roles in also maintaining intracellular redox balance (14), acetate and  
401 lactate production may be reflective of redox levels in the presence of CCCP. Cells that are more  
402 efficient in energy production and carbon cycling may reuse end products of fermentation rather  
403 than secrete them into the supernatant. Decreased metabolic efficiency was found in an *arcA*  
404 mutant of *E. coli* undergoing anaerobic fermentation based on a 15.8% lower growth rate relative  
405 to the wild-type strain (19). *K. pneumoniae* and *S. marcescens arcA* mutants excreted higher levels  
406 of acetate in CCCP, which does differ from *E. coli arcA* mutants in other studies which produced  
407 the same level of or less acetate than wild-type strains during anaerobic fermentation (55,56,71).  
408 Disruption of PMF by CCCP may thus induce fermentative conditions differently than  
409 anaerobiosis, or ArcA-mediated fermentation is species specific.

410 We conclude that ArcA responds to low oxygen conditions, decreased iron levels, and host-  
411 mediated membrane damage during bacteremia in three Gram-negative bacterial pathogenic  
412 species. Activation of ArcA in response to low iron and membrane damage was not tested, so it  
413 remains to be determined if ArcA function is controlled in these contexts by conventional models.  
414 ArcA has recently been shown to become partially active independently of ArcB via  
415 intramolecular disulfide bonding in oxidizing conditions, providing evidence of additional

416 regulatory mechanisms to be explored (72). Further studies of ArcA in the bloodstream  
417 environment will be important in understanding the complex regulation of central carbon pathways  
418 utilized during pathogenesis and may reveal more shared or unique metabolic capabilities  
419 employed by multiple bacterial species during infection.

420

## 421 **METHODS**

### 422 **Bacterial strains and culture conditions**

423 The bacterial strains utilized in this study are listed in **Table 1**. *E. coli* TOP10 cells were  
424 used for routine cloning purposes. Overnight culture was performed in LB (73) and experimental  
425 cultures were grown in LB or M9 medium (74) containing 100 $\mu$ M CaCl<sub>2</sub>, 1mM MgSO<sub>4</sub>, 0.4% D-  
426 glucose, and 0.1% casamino acids as indicated. All cultures were maintained at 37°C with  
427 200RPM shaking unless noted otherwise. All anaerobic cultures were maintained in a 37°C  
428 anaerobic chamber maintained at 10% H<sub>2</sub>, 5% CO<sub>2</sub> and 85% N<sub>2</sub>.

429

### 430 **Strain engineering**

431 *C. freundii*, *E. coli*, *K. pneumoniae*, and *S. marcescens arcA* mutants were generated using Lambda  
432 red mutagenesis as previously described (10,75,76) using the oligonucleotides listed in **Table S1**.  
433 Chromosomal mutations were confirmed by PCR-amplification and sequencing of the mutant  
434 allele. *C. freundii* UMH14 and *S. marcescens* UMH9  $\Delta arcA::npII$  mutant alleles were  
435 complemented by re-integration of the wild-type allele via recombineering. Primers were designed  
436 to amplify the portion of the *arcA* gene replaced by the antibiotic resistance cassette in the  
437  $\Delta arcA::npII$  mutants with the same homologous ends via PCR with Q5 polymerase (New England  
438 Biosciences). *C. freundii* and *S. marcescens arcA* mutant strains were transformed with the *arcA*-

439 containing PCR products. Recovery of cells was performed in LB without selection at 30°C.  
440 Transformants were subsequently passaged in LB multiple times to enrich for complemented  
441 mutants via restoration of wild-type growth rates. Enriched populations were then plated onto LB  
442 agar and candidate colonies were scored for reversion to the wild-type colony size.  
443 Complementation was confirmed via Sanger sequencing of PCR products amplified from the *arcA*  
444 locus. The *K. pneumoniae* KPPR1 *arcA* mutant strain was complemented *in trans* using the  
445 pBBR1MCS-5 broad host-range plasmid (77). Primers ANB21F and ANB21R and were used to  
446 amplify the *arcA* ORF and 539 base pairs upstream of the start of the gene with Easy A polymerase  
447 (Agilent). The PCR product and pBBR1MCS-5 parent plasmid were separately digested with SacI  
448 and XbaI. Ligation of the two digested fragments was achieved with T4 DNA ligase (NEB)  
449 followed by electroporation into *E. coli* TOP10 (Thermo Fischer). Plasmid construction was  
450 confirmed by Sanger sequencing. KPPR1  $\Delta arcA::npII$  was transformed with complementation  
451 plasmid by electroporation the complementation or empty vector control plasmids were  
452 maintained in the presence of gentamicin (10 µg/ml).

453

#### 454 **Murine bacteremia model**

455 Overnight LB cultures of wild-type and *arcA* mutant constructs were sub-cultured into  
456 fresh LB and cultured at 37°C with 200 RPM shaking until mid-log phase. Mid-log cultures were  
457 washed and resuspended with PBS and normalized based on OD<sub>600</sub> to achieve the approximate  
458 concentration of bacteria: *C. freundii*: 1 x 10<sup>9</sup> CFU/mL, *E. coli*: 2 x 10<sup>7</sup> CFU/mL, *K. pneumoniae*:  
459 1 x 10<sup>6</sup> CFU/mL, and *S. marcescens*: 1 x 10<sup>8</sup> CFU/mL. Wild-type and *arcA* mutants for each  
460 species were mixed 1:1, and 6 to 8 weeks old male and female C57BL/6 mice (Jackson Laboratory,  
461 Bar Harbor, ME) were inoculated via tail-vein injection as previously described (78). Inocula and

462 organ homogenates were plated on LB agar and LB agar containing kanamycin (50 µg/ml) for  
463 differential CFU determinations. A competitive index was calculated for each organ by dividing  
464 the ratio of mutant to wild-type CFU in the organ by the ratio of mutant to wild-type CFU in the  
465 inoculum. Competitive indices were log-transformed, and significance was determined by a one-  
466 sample *t*-test with a hypothetical value of zero. Murine experiments were performed in compliance  
467 with an animal protocol (PRO00010856) approved by the University of Michigan Institutional  
468 Animal Care & Use Committee.

469

#### 470 **In vitro growth**

471 Aerobic and anaerobic overnight cultures were normalized based on OD<sub>600</sub>, washed and  
472 resuspended with PBS, and subcultured 1:100 into the desired media. For aerobic growth studies,  
473 300µL from each prepared culture was added in triplicate to a honeycomb plate. For iron-limitation  
474 cultures, iron-limited M9 media with and without iron supplementation were prepared for each  
475 species individually: *C. freundii* – 0.6mM 2,2'-dipyridyl (0.6% DMSO) and 3.0mM FeSO<sub>4</sub>; *K.*  
476 *pneumoniae* – 0.2mM 2,2'-dipyridyl (0.2% DMSO) and 0.1mM FeSO<sub>4</sub>; *S. marcescens* – 0.4mM  
477 2,2'-dipyridyl (0.4% DMSO) and 0.2mM FeSO<sub>4</sub>. Growth was assessed by comparing area under  
478 the curve (AUC) in each condition of the mutant and complemented strains to the AUC of the  
479 wild-type strains, and significance was determined with Dunnett's multiple comparisons test. For  
480 cultures containing carbonylcyanide-*m*-chlorophenylhydrazone (CCCP), M9 media including the  
481 following concentrations were prepared for each species: *C. freundii* - 15µM CCCP, *K.*  
482 *pneumoniae* - 20µM CCCP, *S. marcescens* - 25µM CCCP. Plates were incubated on a Bioscreen-  
483 C plate reader with the following settings: 37°C, intermediate continuous shaking, OD<sub>600</sub>  
484 measurement every 15 minutes. For anaerobic growth studies, 200µL from each prepared culture

485 was added in triplicate to a 96 well plate. The plate was incubated in an anaerobic plate reader  
486 (BioTek Powerwave HT) with the following settings: 37°C, no shaking, OD<sub>600</sub> measurement taken  
487 every 10 minutes.

488

### 489 **Survival assays**

490 Pooled human complement serum (Innovative Research Lot #37600) was stored at -80C  
491 and thawed directly prior to use and heat-inactivated at 56°C for 45 minutes, where indicated.  
492 Bacteria cultured to mid-log phase in LB medium were washed and resuspended to a final density  
493 of 2x10<sup>8</sup> CFU/ml in PBS then added to serum in triplicate in 96-well plates. Serum sensitivity was  
494 tested a concentration of 10% (*C. freundii*), 90% (*K. pneumoniae*), or 20% (*S. marcescens*) at  
495 37°C. Bacterial viability was determined after a 90-min exposure by serial dilution and colony  
496 counts relative to time zero. For polymyxin B studies, cells were collected by centrifugation and  
497 resuspended in PBS to an OD<sub>600</sub> of 0.2. Polymyxin B (RPI Lot# 85594-90055) was added to cells  
498 triplicate 96-well plates at a final concentration of 5.0µg/mL (*C. freundii*), 50µg/mL (*K.*  
499 *pneumoniae*), or 100µg/mL (*S. marcescens*) with water serving as the control. Plates were stored  
500 statically for 1 hour at 37°C followed by enumeration of viable bacteria relative to time zero. For  
501 both assays, Dunnett's multiple comparisons test was used to assess statistical significance  
502 following log transformation of data.

503

### 504 **Gene expression**

505 Mid-exponential phase aerobic bacteria were normalized to 2x10<sup>8</sup> CFU/mL in PBS. 10mL  
506 of each resuspended culture was added to a 125mL flask, and 1.0mL of resuspended culture was  
507 kept as an untreated control. Polymyxin B (50uL) was added to each flask for a final concentration



508 of 5.0µg/mL. Flasks were then incubated at 37°C and 200 RPM shaking for 15 minutes. 1.0mL of  
509 treated and untreated culture were added directly to 2mL of RNA protect solution (Qiagen), and  
510 RNA was extracted with the RNeasy Mini Kit (Qiagen) following manufacturer's instructions.  
511 RNA samples were treated with RQ1 DNase (Promega) and repurified with the RNeasy Mini Kit  
512 (Qiagen). cDNA was generated with iScript cDNA Synthesis Kit (Bio-Rad) and diluted 1:10 with  
513 water. RT-qPCR was performed with Power SYBR Green (Thermo Fischer) followed by  
514 calculation of relative gene expression with the  $2^{-\Delta\Delta C_t}$  (Livak) method (79). In untreated conditions,  
515 gene expression was compared to the wild-type strain following log transformation, and  
516 significance was determined via a one-sample *t*-test with a null hypothetical value of zero.  
517 Expression of each gene was compared between untreated and polymyxin B conditions, and  
518 significance was determined by comparing the wild-type strain with the mutant and complemented  
519 strains with Dunnett's multiple comparisons test.

520

### 521 **Metabolite quantification**

522 The experimental set-up was the same as that of the CCCP growth curve studies with the  
523 addition of two wells per strain and condition for sampling. OD<sub>600</sub> readings were monitored in real  
524 time via the Bioscreen-C plate reader. Upon reaching early exponential phase, 300uL was removed  
525 from two wells for each strain and condition and immediately transferred to ice. An aliquot of each  
526 sample was removed for CFU enumeration before cells were pelleted in a 4°C microcentrifuge.  
527 The supernatant was transferred to a new tube and immediately stored at -80°C. Supernatant  
528 samples were processed by the University of Michigan Metabolomics Core to quantify acetate and  
529 lactate.

530 Short chain fatty acids (SCFAs), including acetate, were measured using a modified

531 version of a previously described protocol (80). SCFAs in the sample supernatant were derivatized  
532 using 3-nitrophenylhydrazine and an EDAC-6% pyridine solution. Samples were analyzed via LC-  
533 MS alongside acetate controls ranging from 3 $\mu$  to 3000 $\mu$ M using an Agilent (Santa Clara, CA)  
534 1290 LC coupled to an Agilent 6490 triple quadrupole MS. The chromatographic column was a  
535 Waters (Milford, MA) HSS T3, 2.1 mm x 100 mm, 1.7  $\mu$ m particle size. Quantitation was  
536 performed using Agilent MassHunter Quantitative Analysis software version 8.0 by measuring the  
537 ratio of peak area of the 3-NPH derivatized SCFA species to its closest internal standard.

538 Lactate quantification was performed starting with the addition of an extraction solvent  
539 containing <sup>13</sup>C Lactate to each supernatant sample. Following a series of mixing and  
540 centrifugation, supernatant was collected and dried using a nitrogen blower. Samples were  
541 reconstituted alongside a series of calibration standards. Ion pairing reverse phase LC-MS analysis  
542 was then performed using an Infinity Lab II UPLC coupled with a 6545 QToF mass spectrometer  
543 (Agilent Technologies, Santa Clara, CA) and a JetStream ESI source in negative mode.  
544 Chromatographic separation was performed on an Agilent ZORBAX RRHD Extend 80Å C18, 2.1  
545  $\times$  150 mm, 1.8  $\mu$ m column with an Agilent ZORBAX SB-C8, 2.1 mm  $\times$  30 mm, 3.5  $\mu$ m guard  
546 column. Data were processed using MassHunter Quantitative analysis version B.07.00.

547

#### 548 **Lactate dehydrogenase measurement**

549 Bacteria were cultured as described for metabolite quantification and early exponential  
550 phase cells were collected via centrifugation at 4°C. The supernatant was removed, and cells were  
551 washed once then resuspended in PBS at 4°C prior to sonication. Cells were lysed by sonication  
552 with a taper microtip Z192740-1EA (Sigma-Aldrich) with the following protocol: 1 min. 40s.  
553 sonication at 40% amplitude with 4 s. bursts divided by 10 s. pauses to avoid overheating. Lactate

554 dehydrogenase was measured in triplicate from cleared lysates with the Amplitude® Fluorimetric D-  
555 Lactate Dehydrogenase (LDH) Assay Kit from AAT Bioquest per the manufacturer's instructions.  
556 Fluorescence (excitation: 540nm; emission: 590nm) was measured after one hour incubation at  
557 room temperature protected from light with a Synergy H1 plate reader. LDH was quantified in  
558 samples based on standards ranging from 1µM/mL LDH to 200µM/mL. LDH concentration per 1  
559 x 10<sup>9</sup> cells was subsequently normalized based on CFU enumeration and compared for each strain  
560 between untreated and CCCP-treated conditions. Significance was determined by comparing LDH  
561 levels for strains in untreated and treated conditions using Šídák's multiple comparisons test.

562

### 563 **In silico analyses**

564 ArcA amino acids sequences (n=419) from 418 Enterobacterales species were collated  
565 from BV-BRC (81) (**File S1**). A multi-sequence alignment was generated with MUSCLE via  
566 EMBL-EBI (82,83). An ArcA predicted structure AF-P0A9Q1-F1 from Alpha Fold was retrieved  
567 via UniProt to serve as a template for conservation mapping (23,24,84). Consurf calculated  
568 conservation scores from the multiple sequence alignment based on the sequence extracted from  
569 the predicted structure via a JTT evolutionary model (**File S2**) (85,86). Conservation scores were  
570 mapped onto the predicted ArcA structure by Consurf with visualization of this projection  
571 provided by PyMOL (26). The ArcA amino acid sequences of *C. freundii* UMH14, *E. coli*  
572 CFT073, *K. pneumoniae* KPPR1, and *S. marcescens* UMH9 were aligned with Clustal Omega  
573 (30). A percent identity matrix was generated to calculate pairwise percent identities for all  
574 possible combinations of the four species. The output of amino acid alignment between all four  
575 species was then examined to assess conservation. Similarity of non-conserved residues was  
576 defined according to set parameters with a Gonnet PAM 250 matrix score of >0.5 signifying

577 “strongly similar” and a score  $<0.5$  and  $>0$  for “weakly similar” residues.

578 ArcA binding sequences in the promoters of *acs*, *astC*, *fadE*, *feoB*, *lldP*, *putP*, and *ugpB*  
579 from *E. coli* K-12 MG1655 were used as the input motif with which to scan the promoters of the  
580 same genes in *C. freundii*, *K. pneumoniae*, and *S. marcescens* (18). Sequences identified by FIMO  
581 Version 5.5.1 from MEME Suite were reported as potential ArcA binding sequences when *p*-  
582 values and *q*-values (false discovery rate) were both  $\leq 0.05$  (87). Nucleotides of the *E. coli* sequence  
583 and the sequences of the other species were compared to assess homology. Putative direct repeats  
584 were mapped onto the proposed ArcA sequences based on the coordinates reported in the *E. coli*  
585 sequences.

586

## 587 **ACKNOWLEDGEMENTS**

588 We thank current and past members of the Mobley and Bachman laboratories for their  
589 continual feedback over the course of these studies. We also thank Dr. Maria Sandkvist for her  
590 expertise and insight while planning and interpreting many of the experiments as well as the  
591 laboratories of Dr. Nicole Koropatkin and Dr. Eric Martens for technical support and equipment  
592 used during the anaerobic studies. The Biomedical Research Core Facilities at the University of  
593 Michigan and associated vendors are acknowledged for their services including DNA sequencing  
594 and metabolomics. The summary figure was created with BioRender.com. We lastly acknowledge  
595 the use of C57BL/6 mice sacrificed during the bacteremia model.

596

597 **REFERENCES**

- 598 1. André AC, Debande L, Marteyn BS. The selective advantage of facultative anaerobes relies  
599 on their unique ability to cope with changing oxygen levels during infection. *Cell Microbiol.*  
600 2021;23(8):e13338.
- 601 2. Thaden JT, Li Y, Ruffin F, Maskarinec SA, Hill-Rorie JM, Wanda LC, et al. Increased Costs  
602 Associated with Bloodstream Infections Caused by Multidrug-Resistant Gram-Negative  
603 Bacteria Are Due Primarily to Patients with Hospital-Acquired Infections. *Antimicrob*  
604 *Agents Chemother.* 2017;61(3).
- 605 3. Holmes CL, Anderson MT, Mobley HLT, Bachman MA. Pathogenesis of Gram-Negative  
606 Bacteremia. *Clin Microbiol Rev* [Internet]. 2021 Jun 16 [cited 2021 Apr 5];34(2). Available  
607 from: <https://cmr.asm.org/content/34/2/e00234-20>
- 608 4. Rhee C, Jones TM, Hamad Y, Pande A, Varon J, O'Brien C, et al. Prevalence, Underlying  
609 Causes, and Preventability of Sepsis-Associated Mortality in US Acute Care Hospitals.  
610 *JAMA Netw Open.* 2019 Feb 15;2(2):e187571.
- 611 5. Umemura Y, Ogura H, Takuma K, Fujishima S, Abe T, Kushimoto S, et al. Current  
612 spectrum of causative pathogens in sepsis: A prospective nationwide cohort study in Japan.  
613 *Int J Infect Dis.* 2021 Feb 1;103:343–51.
- 614 6. Rhee C, Kadri SS, Dekker JP, Danner RL, Chen HC, Fram D, et al. Prevalence of Antibiotic-  
615 Resistant Pathogens in Culture-Proven Sepsis and Outcomes Associated With Inadequate  
616 and Broad-Spectrum Empiric Antibiotic Use. *JAMA Netw Open.* 2020 Apr  
617 16;3(4):e202899.

- 618 7. Zhang Y, Wang Q, Yin Y, Chen H, Jin L, Gu B, et al. Epidemiology of Carbapenem-  
619 Resistant Enterobacteriaceae Infections: Report from the China CRE Network. *Antimicrob*  
620 *Agents Chemother.* 2018 Feb;62(2):e01882-17.
- 621 8. Denisuik AJ, Garbutt LA, Golden AR, Adam HJ, Baxter M, Nichol KA, et al. Antimicrobial-  
622 resistant pathogens in Canadian ICUs: results of the CANWARD 2007 to 2016 study. *J*  
623 *Antimicrob Chemother.* 2019 Mar 1;74(3):645–53.
- 624 9. Subashchandrabose S, Smith SN, Spurbeck RR, Kole MM, Mobley HLT. Genome-Wide  
625 Detection of Fitness Genes in Uropathogenic *Escherichia coli* during Systemic Infection.  
626 *PLoS Pathog.* 2013 Dec 5;9(12).
- 627 10. Anderson MT, Mitchell LA, Zhao L, Mobley HLT. Capsule Production and Glucose  
628 Metabolism Dictate Fitness during *Serratia marcescens* Bacteremia. *mBio.* 2017 May  
629 23;8(3):e00740-17.
- 630 11. Anderson MT, Mitchell LA, Zhao L, Mobley HLT. *Citrobacter freundii* fitness during  
631 bloodstream infection. *Sci Rep.* 2018;8(1):11792.
- 632 12. Holmes CL, Wilcox AE, Forsyth V, Smith SN, Moricz BS, Unverdorben LV, et al.  
633 *Klebsiella pneumoniae* causes bacteremia using factors that mediate tissue-specific fitness  
634 and resistance to oxidative stress [Internet]. bioRxiv; 2023 [cited 2023 Mar 14]. p.  
635 2023.02.23.529827. Available from:  
636 <https://www.biorxiv.org/content/10.1101/2023.02.23.529827v1> doi:  
637 10.1101/2023.02.23.529827
- 638 13. King AN, de Mets F, Brinsmade SR. Who’s in control? Regulation of metabolism and  
639 pathogenesis in space and time. *Curr Opin Microbiol.* 2020 Jun;55:88–96.

- 640 14. Brown AN, Anderson MT, Bachman MA, Mobley HLT. The ArcAB Two-Component  
641 System: Function in Metabolism, Redox Control, and Infection. *Microbiol Mol Biol Rev.*  
642 2022 Apr 20;86(2):e00110-21.
- 643 15. Kargeti M, Venkatesh KV. The effect of global transcriptional regulators on the anaerobic  
644 fermentative metabolism of *Escherichia coli*. *Mol Biosyst.* 2017 May 19;13(7):1388–98.
- 645 16. De Souza-Hart JA, Blackstock W, Di Modugno V, Holland IB, Kok M. Two-Component  
646 Systems in *Haemophilus influenzae*: a Regulatory Role for ArcA in Serum Resistance. *Infect*  
647 *Immun.* 2003 Jan;71(1):163–72.
- 648 17. Pardo-Esté C, Hidalgo AA, Aguirre C, Briones AC, Cabezas CE, Castro-Severyn J, et al.  
649 The ArcAB two-component regulatory system promotes resistance to reactive oxygen  
650 species and systemic infection by *Salmonella* Typhimurium. *PLoS ONE.* 2018 Sept 4;13(9).
- 651 18. Park DM, Akhtar MdS, Ansari AZ, Landick R, Kiley PJ. The Bacterial Response Regulator  
652 ArcA Uses a Diverse Binding Site Architecture to Regulate Carbon Oxidation Globally.  
653 *PLoS Genet.* 2013 Oct 17;9(10).
- 654 19. Iyer MS, Pal A, Srinivasan S, Somvanshi PR, Venkatesh KV. Global Transcriptional  
655 Regulators Fine-Tune the Translational and Metabolic Efficiency for Optimal Growth of  
656 *Escherichia coli*. *mSystems.* 2021 Mar 30;6(2).
- 657 20. Federowicz S, Kim D, Ebrahim A, Lerman J, Nagarajan H, Cho B kwan, et al. Determining  
658 the Control Circuitry of Redox Metabolism at the Genome-Scale. *PLoS Genet.* 2014 Apr  
659 3;10(4):e1004264.
- 660 21. Loui C, Chang AC, Lu S. Role of the ArcAB two-component system in the resistance of  
661 *Escherichia coli* to reactive oxygen stress. *BMC Microbiol.* 2009 Aug 28;9:183.

- 662 22. Iyer MS, Pal A, Venkatesh KV. A Systems Biology Approach To Disentangle the Direct and  
663 Indirect Effects of Global Transcription Factors on Gene Expression in *Escherichia coli*.  
664 Microbiol Spectr. 2023 Feb 7;e0210122.
- 665 23. Jumper J, Evans R, Pritzel A, Green T, Figurnov M, Ronneberger O, et al. Highly accurate  
666 protein structure prediction with AlphaFold. Nature. 2021 Aug;596(7873):583–9.
- 667 24. Varadi M, Anyango S, Deshpande M, Nair S, Natassia C, Yordanova G, et al. AlphaFold  
668 Protein Structure Database: massively expanding the structural coverage of protein-sequence  
669 space with high-accuracy models. Nucleic Acids Res. 2022 Jan 7;50(D1):D439–44.
- 670 25. Toro-Roman A, Mack TR, Stock AM. Structural Analysis and Solution Studies of the  
671 Activated Regulatory Domain of the Response Regulator ArcA: A Symmetric Dimer  
672 Mediated by the  $\alpha 4$ - $\beta 5$ - $\alpha 5$  Face. J Mol Biol. 2005 May 27;349(1):11–26.
- 673 26. Schrodinger. The PyMOL Molecular Graphics System, Version 2.5.4. 2015.
- 674 27. Kwon O, Georgellis D, Lin EC. Phosphorelay as the sole physiological route of signal  
675 transmission by the arc two-component system of *Escherichia coli*. J Bacteriol. 2000  
676 Jul;182(13):3858–62.
- 677 28. Nguyen MP, Yoon JM, Cho MH, Lee SW. Prokaryotic 2-component systems and the  
678 OmpR/PhoB superfamily. Can J Microbiol. 2015 Nov;61(11):799–810.
- 679 29. Martínez-Hackert E, Stock AM. Structural relationships in the OmpR family of winged-helix  
680 transcription factors. J Mol Biol. 1997 Jun 13;269(3):301–12.
- 681 30. Sievers F, Wilm A, Dineen D, Gibson TJ, Karplus K, Li W, et al. Fast, scalable generation of  
682 high-quality protein multiple sequence alignments using Clustal Omega. Mol Syst Biol. 2011  
683 Oct 11;7:539.



- 684 31. Anderson MT, Brown AN, Pirani A, Smith SN, Photenhauer AL, Sun Y, et al. Replication  
685 Dynamics for Six Gram-Negative Bacterial Species during Bloodstream Infection. *mBio*.  
686 2021 Aug 31;12(4):e0111421.
- 687 32. Hullahalli K, Waldor MK. Pathogen clonal expansion underlies multiorgan dissemination  
688 and organ-specific outcomes during murine systemic infection. *eLife*. 10:e70910.
- 689 33. Welch RA, Burland V, Plunkett G, Redford P, Roesch P, Rasko D, et al. Extensive mosaic  
690 structure revealed by the complete genome sequence of uropathogenic *Escherichia coli*. *Proc*  
691 *Natl Acad Sci U S A*. 2002 Dec 24;99(26):17020–4.
- 692 34. Mobley HL, Green DM, Trifillis AL, Johnson DE, Chippendale GR, Lockatell CV, et al.  
693 Pyelonephritogenic *Escherichia coli* and killing of cultured human renal proximal tubular  
694 epithelial cells: role of hemolysin in some strains. *Infect Immun*. 1990 May;58(5):1281–9.
- 695 35. Broberg CA, Wu W, Cavalcoli JD, Miller VL, Bachman MA. Complete Genome Sequence  
696 of *Klebsiella pneumoniae* Strain ATCC 43816 KPPR1, a Rifampin-Resistant Mutant  
697 Commonly Used in Animal, Genetic, and Molecular Biology Studies. *Genome Announc*.  
698 2014 Sep 25;2(5).
- 699 36. Nochino N, Toya Y, Shimizu H. Transcription Factor ArcA is a Flux Sensor for the Oxygen  
700 Consumption Rate in *Escherichia coli*. *Biotechnol J*. 2020;15(6):1900353.
- 701 37. Chareyre S, Barras F, Mandin P. A small RNA controls bacterial sensitivity to gentamicin  
702 during iron starvation. *PLOS Genet*. 2019 Apr 22;15(4):e1008078.
- 703 38. Gao G, Li J, Zhang Y, Chang YZ. Cellular Iron Metabolism and Regulation. In: Chang YZ,  
704 editor. *Brain Iron Metabolism and CNS Diseases* [Internet]. Singapore: Springer; 2019 [cited  
705 2022 Sep 23]. p. 21–32. (Advances in Experimental Medicine and Biology). Available from:  
706 [https://doi.org/10.1007/978-981-13-9589-5\\_2](https://doi.org/10.1007/978-981-13-9589-5_2)

- 707 39. Nairz M, Weiss G. Iron in infection and immunity. *Mol Aspects Med.* 2020 Oct  
708 1;75:100864.
- 709 40. Georgellis D, Kwon O, Lin EC. Quinones as the redox signal for the arc two-component  
710 system of bacteria. *Science.* 2001 Jun 22;292(5525):2314–6.
- 711 41. Malpica R, Franco B, Rodriguez C, Kwon O, Georgellis D. Identification of a quinone-  
712 sensitive redox switch in the ArcB sensor kinase. *Proc Natl Acad Sci U S A.* 2004 Sep  
713 7;101(36):13318–23.
- 714 42. Liang H, Zhang Y, Wang S, Gao H. Mutual interplay between ArcA and  $\sigma$ E orchestrates  
715 envelope stress response in *Shewanella oneidensis*. *Environ Microbiol.* 2021;23(2):652-668.
- 716 43. Xie P, Liang H, Wang J, Huang Y, Gao H. Lipopolysaccharide Transport System Links  
717 Physiological Roles of  $\sigma$ E and ArcA in the Cell Envelope Biogenesis in *Shewanella*  
718 *oneidensis*. *Microbiol Spectr.* 2021 Aug 18;e0069021.
- 719 44. Ramos PIP, Custódio MGF, Quispe Saji G del R, Cardoso T, da Silva GL, Braun G, et al.  
720 The polymyxin B-induced transcriptomic response of a clinical, multidrug-resistant  
721 *Klebsiella pneumoniae* involves multiple regulatory elements and intracellular targets. *BMC*  
722 *Genomics.* 2016 Oct 25;17(Suppl 8).
- 723 45. Miajlovic H, Smith SG. Bacterial self-defence: how *Escherichia coli* evades serum killing.  
724 *FEMS Microbiol Lett.* 2014;354(1):1–9.
- 725 46. Huan Y, Kong Q, Mou H, Yi H. Antimicrobial Peptides: Classification, Design, Application  
726 and Research Progress in Multiple Fields. *Front Microbiol.* 2020;11.
- 727 47. Ridyard KE, Overhage J. The Potential of Human Peptide LL-37 as an Antimicrobial and  
728 Anti-Biofilm Agent. *Antibiotics.* 2021 May 29;10(6):650.

- 729 48. Napier BA, Burd EM, Satola SW, Cagle SM, Ray SM, McGann P, et al. Clinical Use of  
730 Colistin Induces Cross-Resistance to Host Antimicrobials in *Acinetobacter baumannii*.  
731 *mBio*. 2013 May 21;4(3).
- 732 49. Unden G, Bongaerts J. Alternative respiratory pathways of *Escherichia coli*: energetics and  
733 transcriptional regulation in response to electron acceptors. *Biochim Biophys Acta BBA -*  
734 *Bioenerg*. 1997 Jul 4;1320(3):217–34.
- 735 50. Förster AH, Gescher J. Metabolic Engineering of *Escherichia coli* for Production of Mixed-  
736 Acid Fermentation End Products. *Front Bioeng Biotechnol*. 2014 May 23;2.
- 737 51. Keevil CW, Hough JS, Cole JA. Regulation of Respiratory and Fermentative Modes of  
738 Growth of *Citrobacter freundii* by Oxygen, Nitrate and Glucose. *J Gen Microbiol*. 1979 Jul  
739 1;113(1):83–95.
- 740 52. Grimont PAD, Grimont F. *Klebsiella*. In: *Bergey's Manual of Systematics of Archaea and*  
741 *Bacteria* [Internet]. John Wiley & Sons, Ltd; 2015 [cited 2023 Mar 7]. p. 1–26. Available  
742 from: <https://onlinelibrary.wiley.com/doi/abs/10.1002/9781118960608.gbm01150>
- 743 53. Pederson CS, Breed RS. THE FERMENTATION OF GLUCOSE BY ORGANISMS OF  
744 THE GENUS *SERRATIA*. *J Bacteriol*. 1928 Sep;16(3):163–85.
- 745 54. Clark DP. The fermentation pathways of *Escherichia coli*. *FEMS Microbiol Lett*.  
746 1989;63(3):223–34.
- 747 55. Bidart GN, Ruiz JA, de Almeida A, Méndez BS, Nickel PI. Manipulation of the Anoxic  
748 Metabolism in *Escherichia coli* by ArcB Deletion Variants in the ArcBA Two-Component  
749 System. *Appl Environ Microbiol*. 2012 Dec;78(24):8784–94.
- 750 56. Egoburo DE, Diaz Peña R, Alvarez DS, Godoy MS, Mezzina MP, Pettinari MJ. Microbial  
751 Cell Factories à la Carte: Elimination of Global Regulators Cra and ArcA Generates

- 752 Metabolic Backgrounds Suitable for the Synthesis of Bioproducts in *Escherichia coli*. Appl  
753 Environ Microbiol. 2018 Oct 1;84(19):e01337-18.
- 754 57. Matsushita K, Kaback HR. D-Lactate oxidation and generation of the proton electrochemical  
755 gradient in membrane vesicles from *Escherichia coli* GR19N and in proteoliposomes  
756 reconstituted with purified D-lactate dehydrogenase and cytochrome o oxidase.  
757 Biochemistry. 1986 May 1;25(9):2321–7.
- 758 58. Carreau A, El Hafny-Rahbi B, Matejuk A, Grillon C, Kieda C. Why is the partial oxygen  
759 pressure of human tissues a crucial parameter? Small molecules and hypoxia. J Cell Mol  
760 Med. 2011 Jun;15(6):1239–53.
- 761 59. Pittman RN. Oxygen Transport [Internet]. Morgan & Claypool Life Sciences; 2011 [cited  
762 2018 Jun 1]. Available from: <https://www.ncbi.nlm.nih.gov/books/NBK54103/>
- 763 60. Alteri CJ, Smith SN, Mobley HLT. Fitness of *Escherichia coli* during Urinary Tract  
764 Infection Requires Gluconeogenesis and the TCA Cycle. PLoS Pathog. 2009 May 29;5(5).
- 765 61. Alteri CJ, Mobley HLT. *Escherichia coli* physiology and metabolism dictates adaptation to  
766 diverse host microenvironments. Curr Opin Microbiol. 2012 Feb;15(1):3–9.
- 767 62. Beauchene NA, Mettert EL, Moore LJ, Keleş S, Willey ER, Kiley PJ. O<sub>2</sub> availability  
768 impacts iron homeostasis in *Escherichia coli*. Proc Natl Acad Sci. 2017 Nov  
769 14;114(46):12261–6.
- 770 63. Baez A, Sharma AK, Bryukhanov A, Anderson ED, Rudack L, Olivares-Hernández R, et al.  
771 Iron availability enhances the cellular energetics of aerobic *Escherichia coli* cultures while  
772 upregulating anaerobic respiratory chains. New Biotechnol. 2022 Nov 25;71:11–20.
- 773 64. Wang GL, Semenza GL. General involvement of hypoxia-inducible factor 1 in  
774 transcriptional response to hypoxia. Proc Natl Acad Sci U S A. 1993 May 1;90(9):4304–8.

- 775 65. Shah YM, Xie L. Hypoxia-Inducible Factors Link Iron Homeostasis and Erythropoiesis.  
776 Gastroenterology. 2014 Mar 1;146(3):630–42.
- 777 66. Hu CJ, Wang LY, Chodosh LA, Keith B, Simon MC. Differential Roles of Hypoxia-  
778 Inducible Factor 1 $\alpha$  (HIF-1 $\alpha$ ) and HIF-2 $\alpha$  in Hypoxic Gene Regulation. Mol Cell Biol. 2003  
779 Dec;23(24):9361–74.
- 780 67. Morales EH, Collao B, Desai PT, Calderón IL, Gil F, Luraschi R, et al. Probing the ArcA  
781 regulon under aerobic/ROS conditions in *Salmonella enterica* serovar Typhimurium. BMC  
782 Genomics. 2013 Sep 17;14:626.
- 783 68. Jiang F, An C, Bao Y, Zhao X, Jernigan RL, Lithio A, et al. ArcA Controls Metabolism,  
784 Chemotaxis, and Motility Contributing to the Pathogenicity of Avian Pathogenic *Escherichia*  
785 *coli*. Infect Immun. 2015 Aug 12;83(9):3545–54.
- 786 69. Sabnis A, Hagart KL, Klöckner A, Becce M, Evans LE, Furniss RCD, et al. Colistin kills  
787 bacteria by targeting lipopolysaccharide in the cytoplasmic membrane. Cole PA, Gao L, van  
788 Schaik W, editors. eLife. 2021 Apr 6;10:e65836.
- 789 70. Deris ZZ, Akter J, Sivanesan S, Roberts KD, Thompson PE, Nation RL, et al. A secondary  
790 mode of action of polymyxins against Gram-negative bacteria involves the inhibition of  
791 NADH-quinone oxidoreductase activity. J Antibiot (Tokyo). 2014 Feb;67(2):147–51.
- 792 71. Waegeman H, Beauprez J, Moens H, Maertens J, De Mey M, Foulquié-Moreno MR, et al.  
793 Effect of *iclR* and *arcA* knockouts on biomass formation and metabolic fluxes in *Escherichia*  
794 *coli* K12 and its implications on understanding the metabolism of *Escherichia coli* BL21  
795 (DE3). BMC Microbiol. 2011 Apr 11;11:70.

- 796 72. Zhou Y, Pu Q, Chen J, Hao G, Gao R, Ali A, et al. Thiol-based functional mimicry of  
797 phosphorylation of the two-component system response regulator ArcA promotes  
798 pathogenesis in enteric pathogens. *Cell Rep.* 2021 Dec 21;37(12):110147.
- 799 73. Bertani G. Studies on Lysogenesis I: The Mode of Phage Liberation by Lysogenic  
800 *Escherichia coli*. *J Bacteriol.* 1951 Sep;62(3):293–300.
- 801 74. Jeffrey H. Miller. Experiments in molecular genetics. United States: 9780879691066; 1972.
- 802 75. Yu D, Ellis HM, Lee EC, Jenkins NA, Copeland NG, Court DL. An efficient recombination  
803 system for chromosome engineering in *Escherichia coli*. *Proc Natl Acad Sci U S A.* 2000  
804 May 23;97(11):5978–83.
- 805 76. Thomason LC, Sawitzke JA, Li X, Costantino N, Court DL. Recombineering: genetic  
806 engineering in bacteria using homologous recombination. *Curr Protoc Mol Biol.* 2014 Apr  
807 14;106:1.16.1-39.
- 808 77. Kovach ME, Elzer PH, Steven Hill D, Robertson GT, Farris MA, Roop RM, et al. Four new  
809 derivatives of the broad-host-range cloning vector pBBR1MCS, carrying different antibiotic-  
810 resistance cassettes. *Gene.* 1995 Dec 1;166(1):175–6.
- 811 78. Smith SN, Hagan EC, Lane MC, Mobley HLT. Dissemination and Systemic Colonization of  
812 Uropathogenic *Escherichia coli* in a Murine Model of Bacteremia. *mBio.* 2010 Dec 30;1(5).
- 813 79. Schmittgen TD, Livak KJ. Analyzing real-time PCR data by the comparative C(T) method.  
814 *Nat Protoc.* 2008;3(6):1101–8.
- 815 80. Yue M, Kim JH, Evans CR, Kachman M, Erb-Downward JR, D’Souza J, et al. Measurement  
816 of Short-Chain Fatty Acids in Respiratory Samples: Keep Your Assay above the Water Line.  
817 *Am J Respir Crit Care Med.* 2020 Aug 15;202(4):610–2.

- 818 81. Olson RD, Assaf R, Brettin T, Conrad N, Cucinell C, Davis JJ, et al. Introducing the  
819 Bacterial and Viral Bioinformatics Resource Center (BV-BRC): a resource combining  
820 PATRIC, IRD and ViPR. *Nucleic Acids Res.* 2023 Jan 6;51(D1):D678–89.
- 821 82. Edgar RC. MUSCLE: a multiple sequence alignment method with reduced time and space  
822 complexity. *BMC Bioinformatics.* 2004 Aug 19;5:113.
- 823 83. Madeira F, Pearce M, Tivey ARN, Basutkar P, Lee J, Edbali O, et al. Search and sequence  
824 analysis tools services from EMBL-EBI in 2022. *Nucleic Acids Res.* 2022 Apr  
825 12;50(W1):W276-279.
- 826 84. UniProt Consortium. UniProt: the universal protein knowledgebase in 2021. *Nucleic Acids*  
827 *Res.* 2021 Jan 8;49(D1):D480–9.
- 828 85. Ashkenazy H, Abadi S, Martz E, Chay O, Mayrose I, Pupko T, et al. ConSurf 2016: an  
829 improved methodology to estimate and visualize evolutionary conservation in  
830 macromolecules. *Nucleic Acids Res.* 2016 Jul 8;44(W1):W344-350.
- 831 86. Darriba D, Taboada GL, Doallo R, Posada D. ProtTest 3: fast selection of best-fit models of  
832 protein evolution. *Bioinforma Oxf Engl.* 2011 Apr 15;27(8):1164–5.
- 833 87. Grant CE, Bailey TL, Noble WS. FIMO: scanning for occurrences of a given motif.  
834 *Bioinforma Oxf Engl.* 2011 Apr 1;27(7):1017–8.

835

## 836 **SUPPORTING INFORMATION**

837 File S1: Table of Enterobacterales genomes and ArcA ORFs analyzed for conservation modeling

838 File S2: Specific amino acid residue information of ArcA conservation model

839 Figures S1 – S5 and Table S1 are provided in “Supporting Figures and Table.”

840 FIGURES

**A**

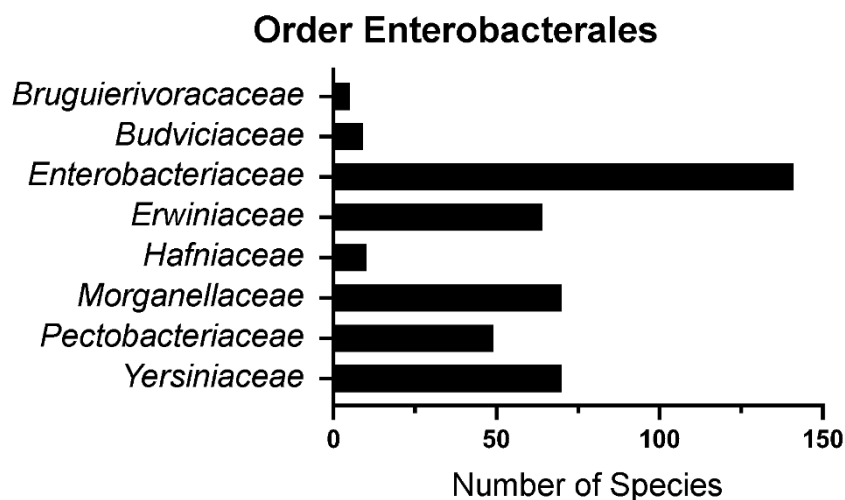

**B**

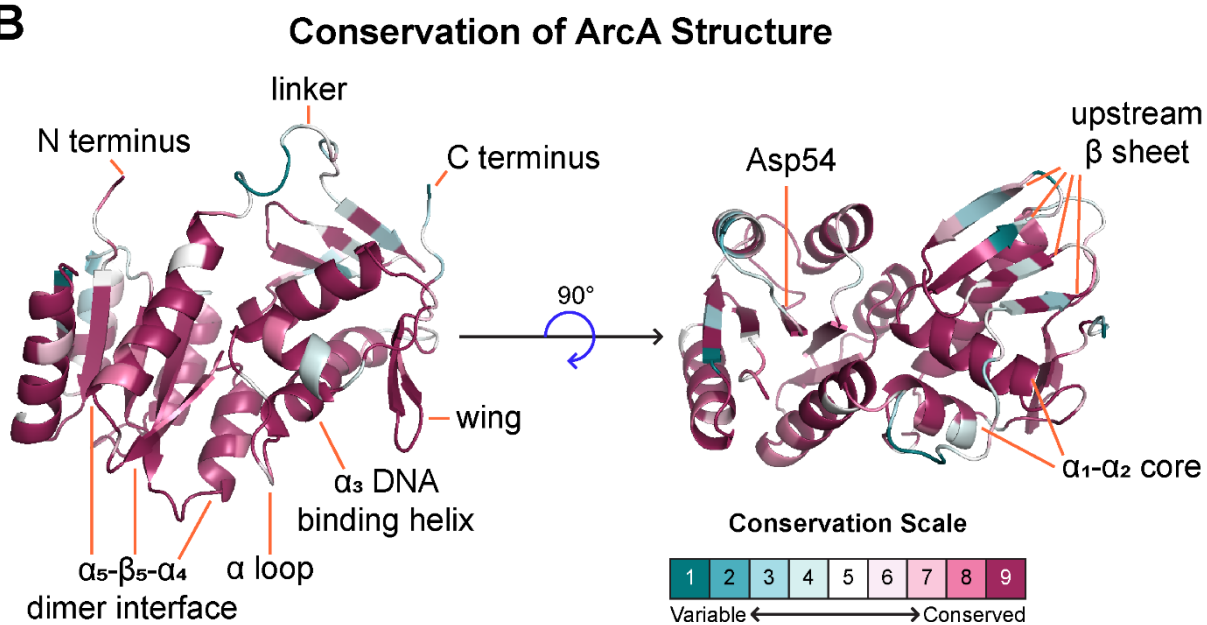

841 **Fig. 1: ArcA is structurally conserved across Order Enterobacterales.** (A) 419 ArcA amino  
842 acid sequences of 418 species across 8 families in Order Enterobacterales were identified with  
843 BVR-RC and aligned (**File S1**). (B) The multi-sequence sequence alignment was mapped onto a  
844 structure of ArcA with Consurf and visualized with pyMOL. The average grade of conservation  
845 for 238 residues on a scale of 1 to 9 was 7.7. The regions with the greatest variation in conservation  
846 are the linker domain and the upstream  $\beta$  sheet of the DNA binding domain. ArcB activates ArcA  
847 via phosphorylation of Asp<sup>54</sup> which is highly conserved among the species examined in addition  
848 to the DNA binding helix and structures supporting it. Conservation of individual residues are  
849 available in **File S2**.



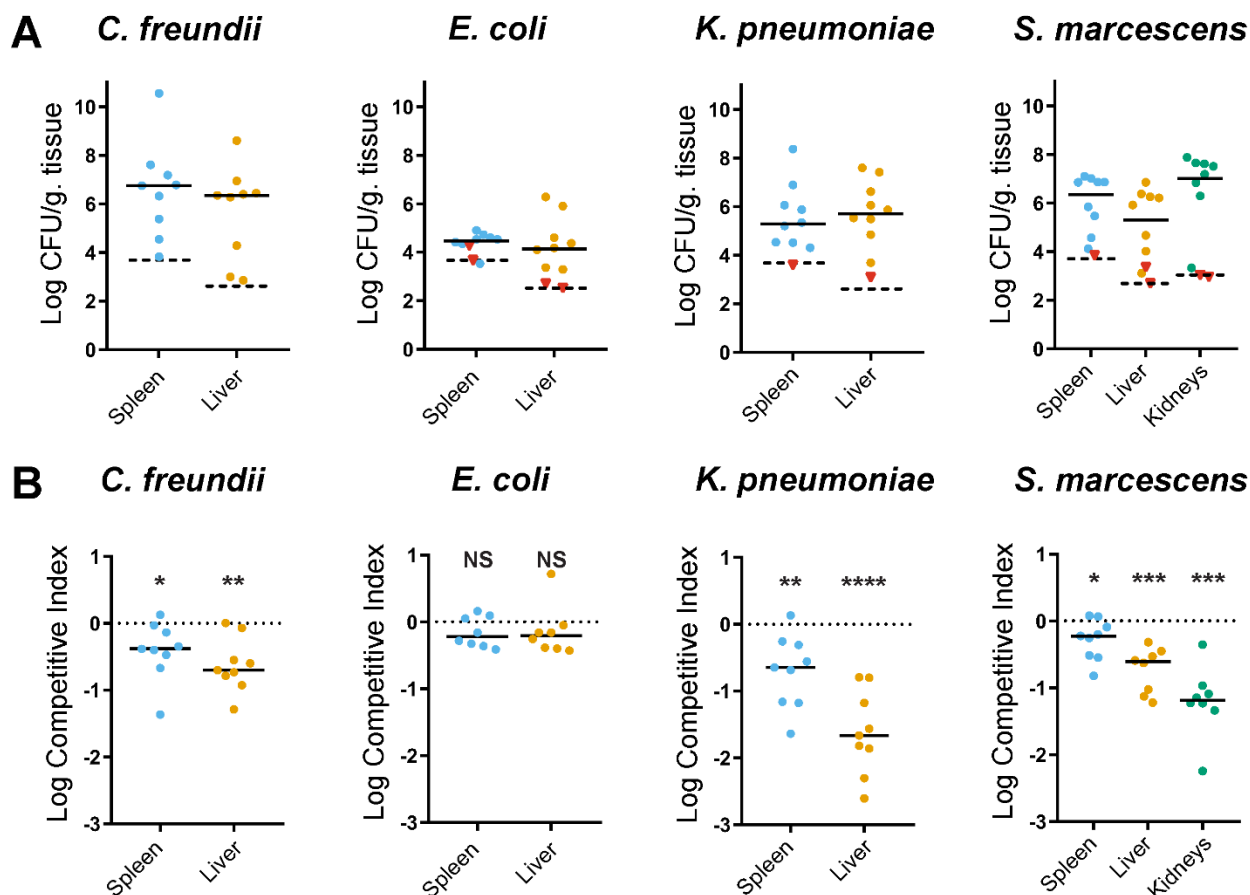

850 **Fig. 2: *arcA* encodes a fitness factor in a murine model of bacteremia.** Wild-type (WT) and  
 851  $\Delta arcA$  mutant strains were cultured to mid-log phase in LB. Cells were washed in PBS and mixed  
 852 1:1 to prepare the inoculum for each species at an average target total CFU of  $1 \times 10^8$  (*C. freundii*),  
 853  $1 \times 10^5$  (*K. pneumoniae*),  $1 \times 10^7$  (*Serratia marcescens*), and  $2 \times 10^6$  (*E. coli*). Mice were sacrificed  
 854 24 hours post tail vein inoculation, and organs were harvested and plated on LB with and without  
 855 antibiotics for differential CFU enumeration. **(A)** Total CFU were normalized to tissue weight for  
 856 all organs. The limit of detection is denoted as a dashed black line, and red triangles are samples  
 857 not included in calculating competitive indices due to limited CFU recovery. **(B)** Competitive  
 858 indices (CI) were calculated by dividing the ratio of *arcA* mutant counts to WT counts in the  
 859 inoculum (input) to that in the organs (output). Dots in the burden and CI graphs represents the  
 860 organ from one mouse, and median values are presented as solid horizontal lines. Significance of  
 861 log transformed CI was determined via a one-sample *t*-test with a null hypothetical value of zero,  
 862 represented as a dotted a line. *p*-values: \* $\leq 0.05$ , \*\* $\leq 0.01$ , \*\*\* $\leq 0.001$ , NS = not significant

863  
864

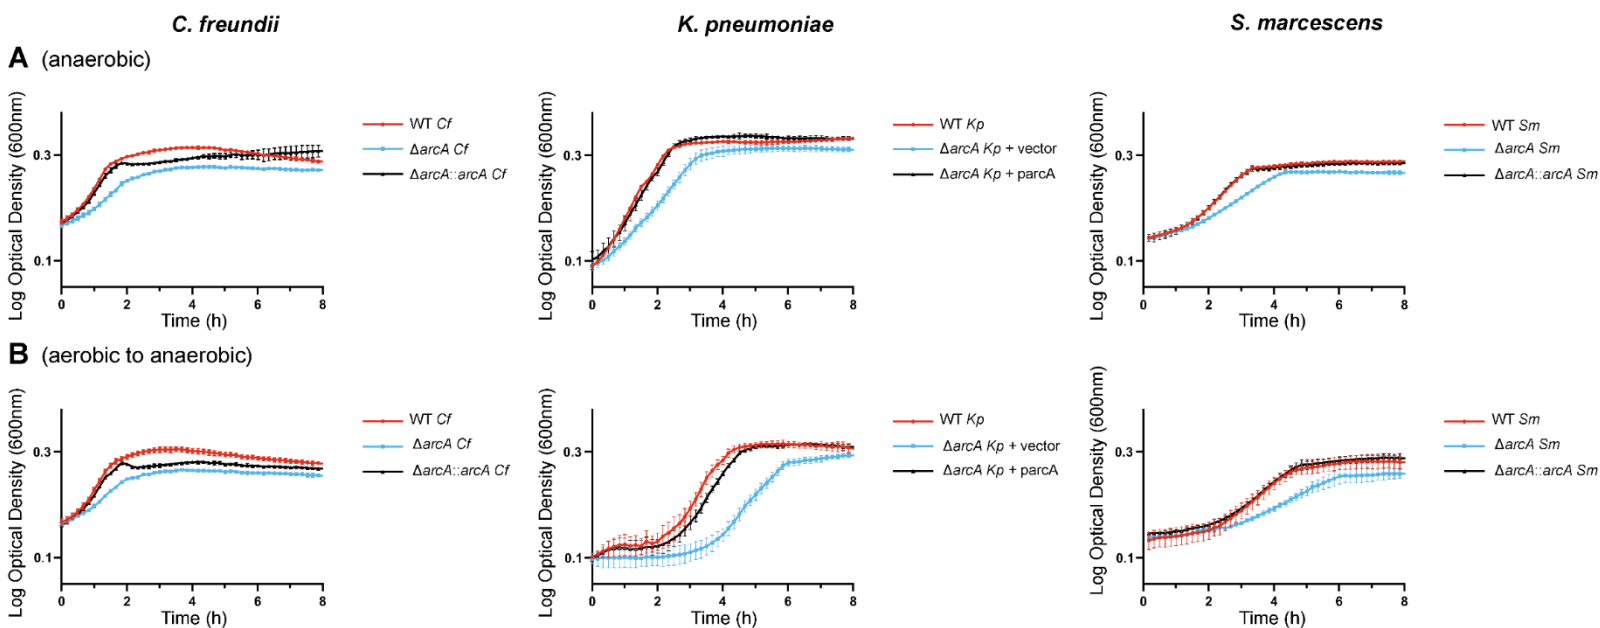

865

866 **Fig. 3: Growth defects of the *K. pneumoniae* and *S. marcescens*  $\Delta arcA$  mutants are more**  
867 **pronounced during the aerobic to anaerobic transition.** Strains were grown overnight in LB in  
868 **(A)** anaerobic or **(B)** aerobic conditions and then normalized based on OD<sub>600</sub>. Fresh LB was  
869 inoculated with normalized overnight cultures in an anaerobic chamber. OD<sub>600</sub> was then measured  
870 with a plate reader every 10 minutes. The graphs presented here are representative of three  
871 independent experiments. Each strain was grown in triplicate, and the average with standard  
872 deviation was plotted over time.

873

874

875

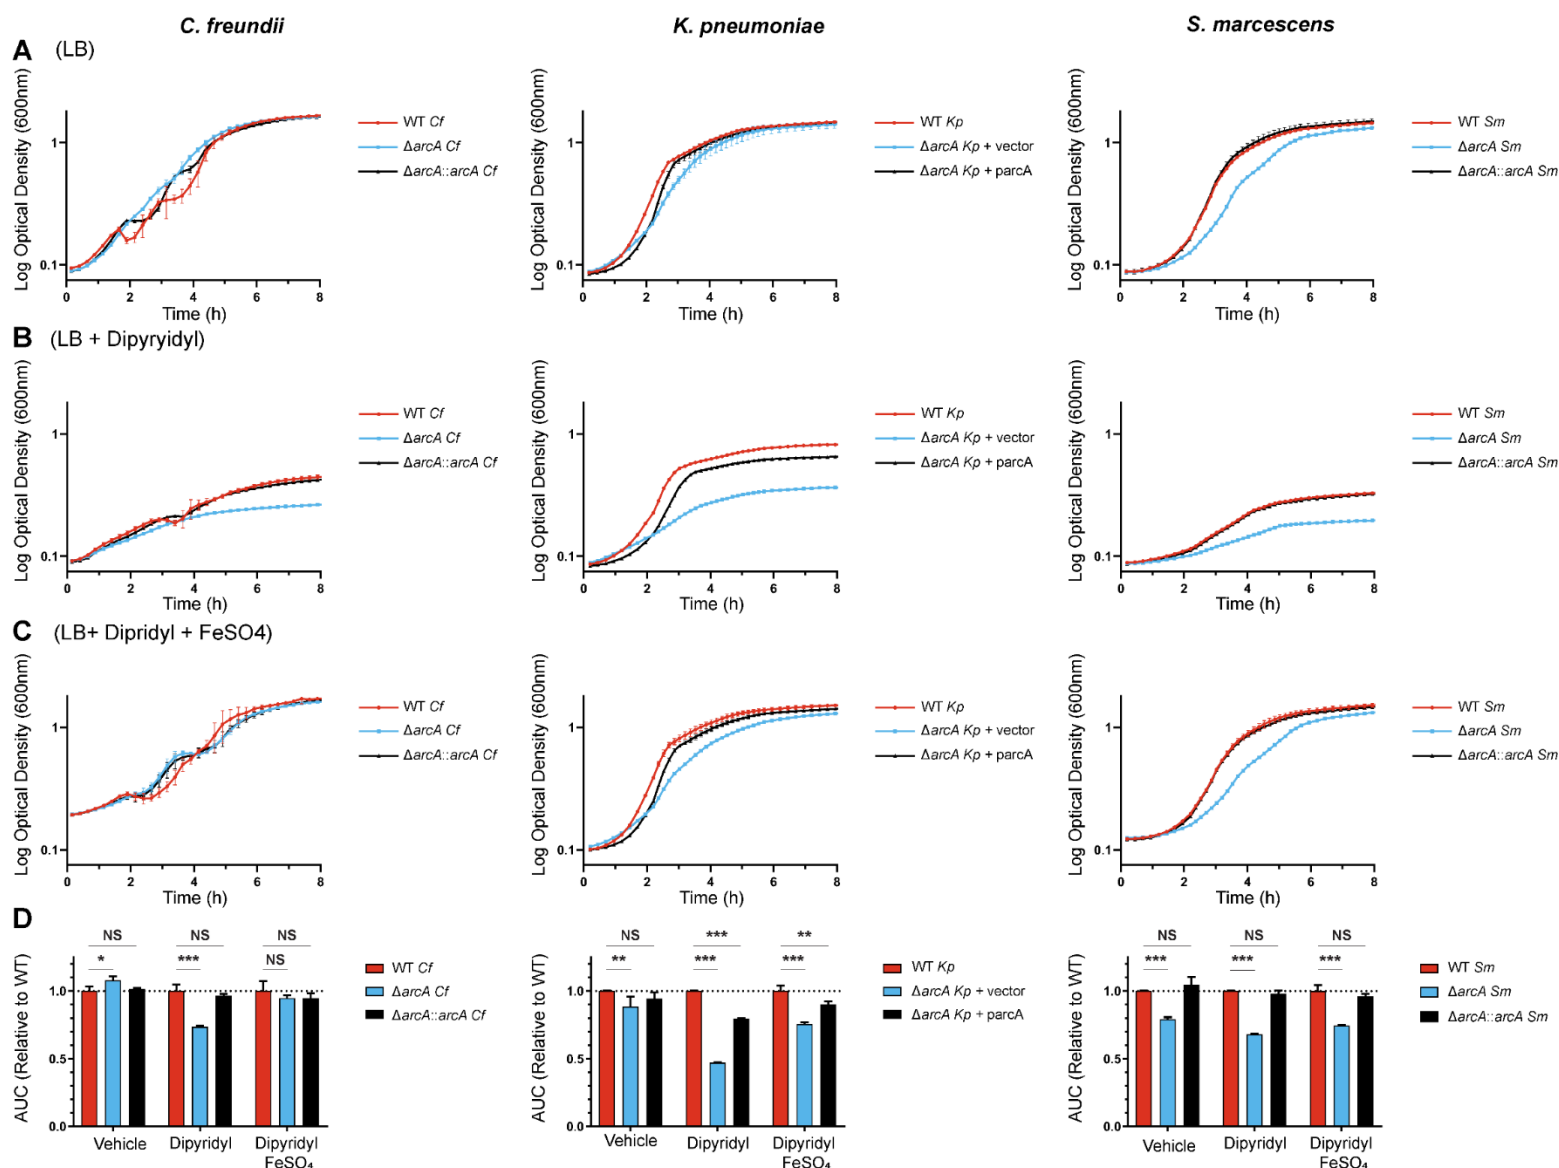

876 **Fig. 4: ArcA optimizes growth in an iron-limited medium in aerobic conditions.** Overnight  
 877 cultures incubated aerobically in LB were inoculated into fresh LB containing (A) DMSO, (B)  
 878 dipyrindyl, or (C) dipyrindyl supplemented with FeSO<sub>4</sub>. Cultures were incubated at 37°C in aerobic  
 879 conditions and growth was tracked via OD<sub>600</sub> by a plate reader every 15 minutes. Growth curves  
 880 are the average of technical triplicates with standard deviation and are representative of three  
 881 independent experiments. (D) Growth was assessed by calculating area under the curve (AUC)  
 882 and comparing this value to the AUC of the wild-type in each condition. Bars represent the average  
 883 of the technical triplicates of the representative growth curves with standard deviation.  
 884 Significance was determined by comparing the wild-type strain with the mutant and complemented

885 strains with Dunnett's multiple comparisons test.  $p$ -values:  $^*\leq 0.05$ ,  $^{**}\leq 0.01$ ,  $^{***}\leq 0.001$ , NS = not  
886 significant

887

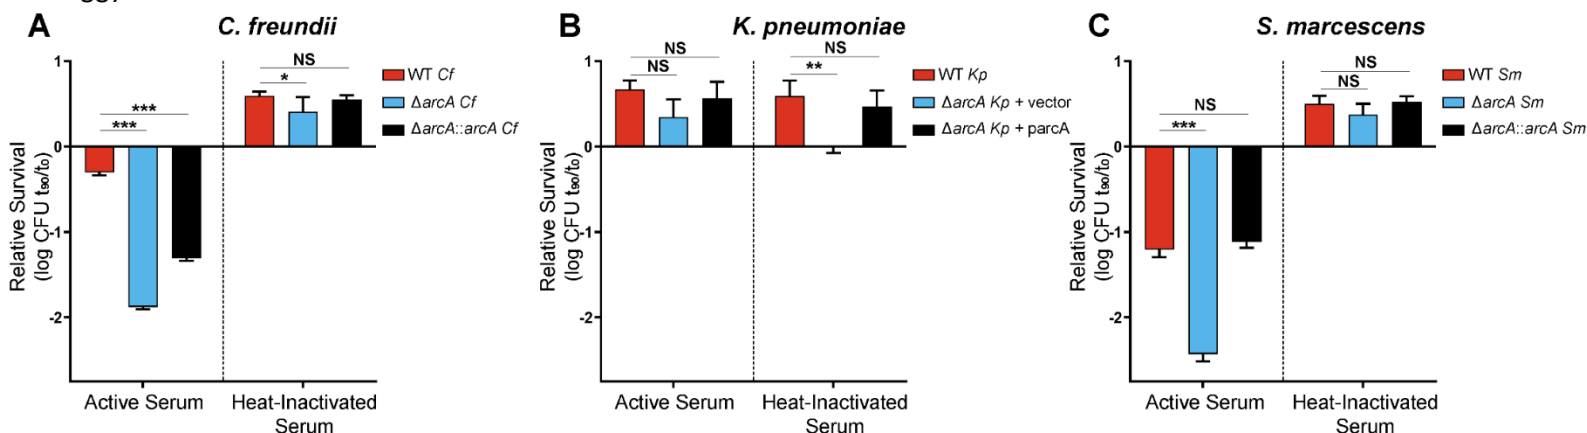

888 **Fig. 5: ArcA is required for serum resistance of *C. freundii* and *S. marcescens*.** Overnight  
889 cultures incubated in LB medium were sub-cultured into LB medium and incubated aerobically  
890 until mid-log phase. Cells were normalized and resuspended in active and heat-inactivated human  
891 serum to a final concentration of approximately  $2 \times 10^8$  CFU/mL. Cultures were then incubated at  
892  $37^\circ\text{C}$  for 90 minutes with sampling before and after incubation for CFU enumeration. Each species  
893 was treated with an empirically determined concentration of human serum at the following final  
894 concentrations: **(A)** *C. freundii*: 10%; **(B)** *K. pneumoniae*: 90%; **(C)** *S. marcescens*: 40%. Average  
895 values of technical triplicates with standard deviation are presented on each graph and are  
896 representative of three independent experiments. Significance was determined by comparing the  
897 wild-type strain with the mutant and complemented strains with Dunnett's multiple comparisons  
898 test.  $p$ -values:  $^*\leq 0.05$ ,  $^{**}\leq 0.01$ ,  $^{***}\leq 0.001$ , NS = not significant

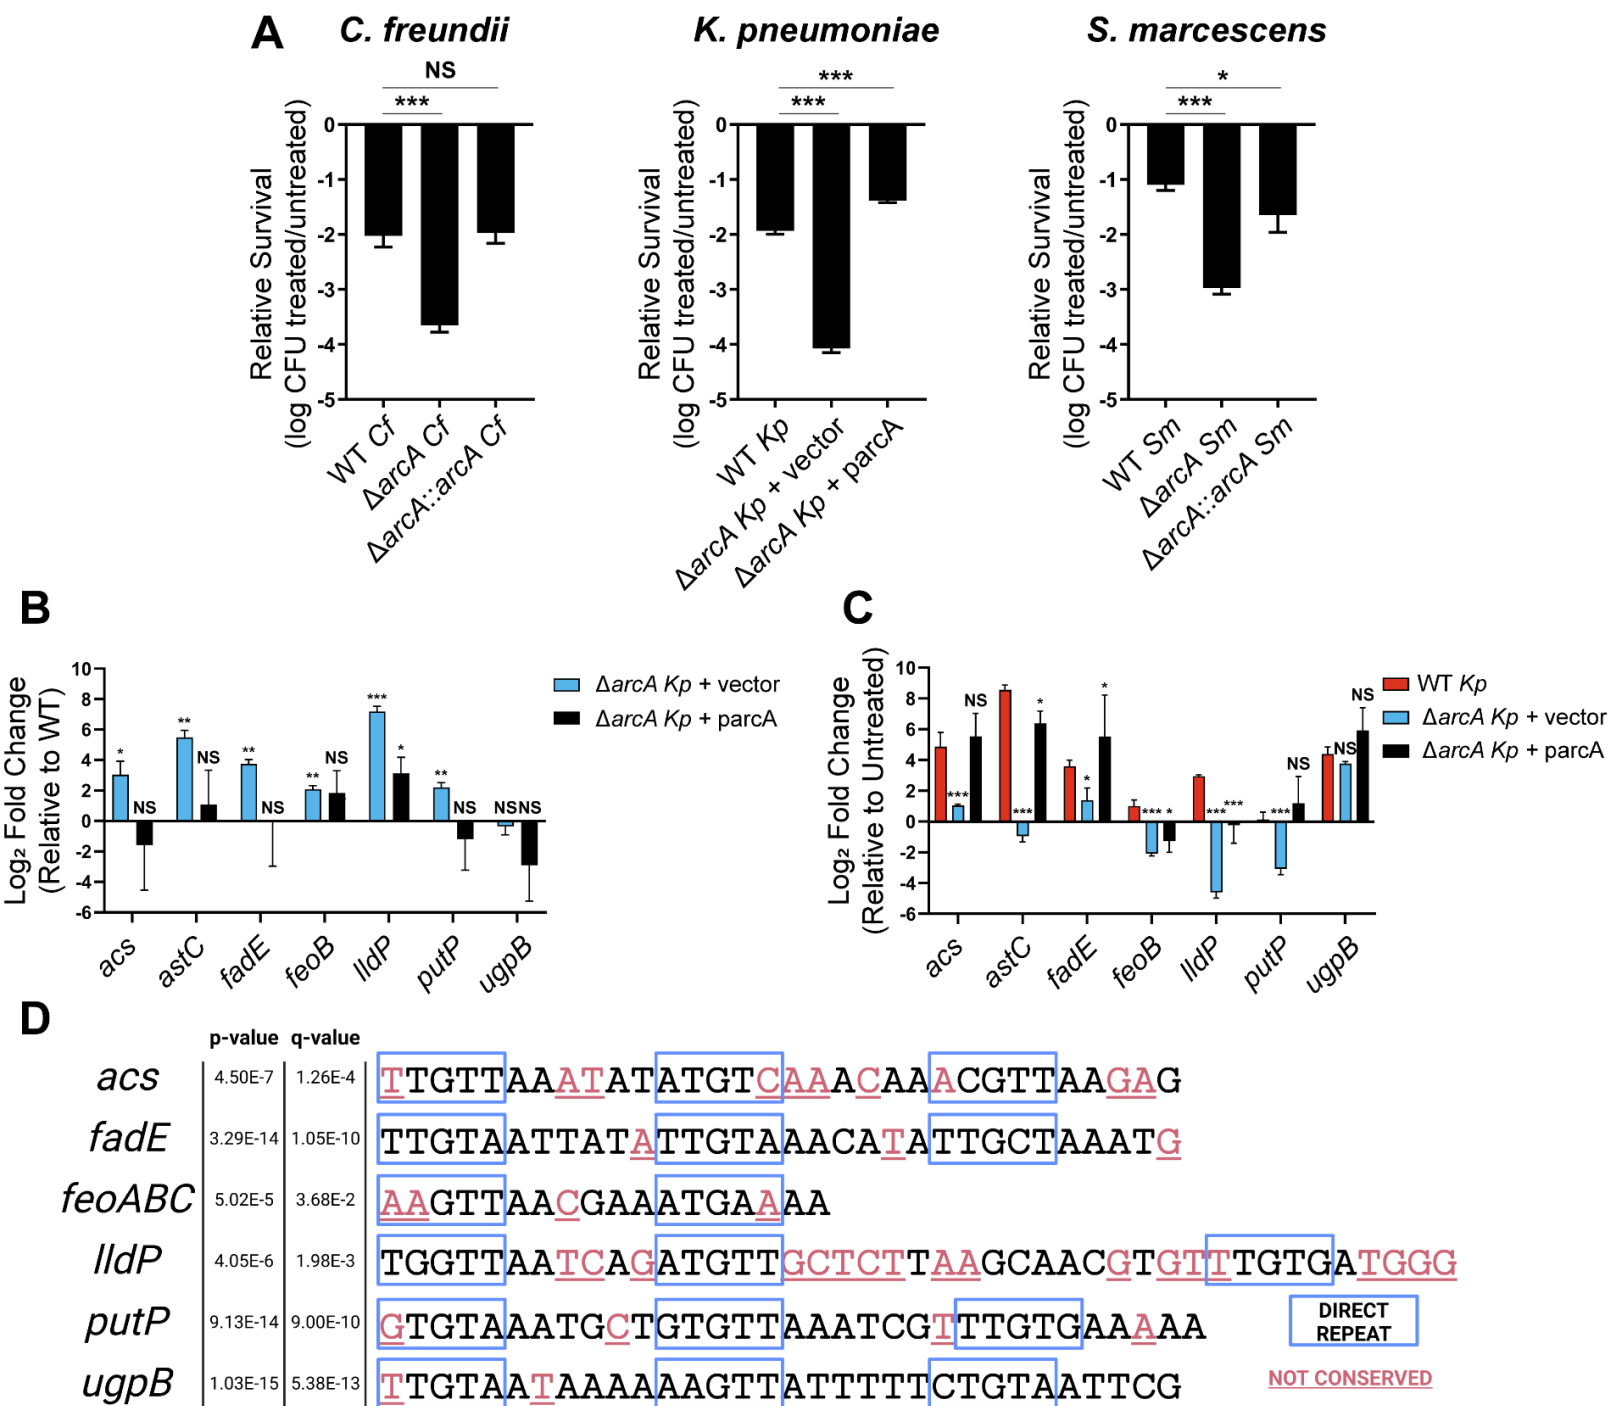

900 **Fig. 6: ArcA is involved in the polymyxin B response.** (A) Overnight cultures grown in LB  
 901 medium were sub-cultured into LB medium and incubated aerobically to mid-log phase. Cultures  
 902 were normalized to an OD<sub>600</sub> 0.2 and treated with polymyxin B for one hour at 37°C. Survival was  
 903 assessed relative to untreated cultures, and the log transformed data are presented as an average of  
 904 technical triplicates. Each graph is representative of three independent experiments. Significance

905 was determined by comparing the wild-type strain with the mutant and complemented strains with  
906 Dunnett's multiple comparisons test. **(B-C)** To measure expression of candidate ArcA-regulated  
907 genes in the wild-type, *arcA*, and complemented *arcA* KPPR1 strains, mid-log phase cells grown  
908 in LB were normalized to approximately  $2 \times 10^8$  CFU/mL in PBS. Cells were treated with 5 $\mu$ g/mL  
909 polymyxin B for 15 minutes followed by RNA extraction. RT-qPCR was performed to assess  
910 expression of *acs*, *astC*, *fade*, *feoB*, *lldP*, *ugpB* with *gap* serving as the housekeeping gene. Results  
911 are displayed as log<sub>2</sub> fold change and are the average of 3 biological replicates with standard  
912 deviation. **(B)** In untreated conditions, expression of each gene by the mutant and complemented  
913 strains was compared to that of the wild-type strain following normalizing of Ct values to *gap* and  
914 log transformation. Significance was determined via a one-sample *t*-test with a null hypothetical  
915 value of zero. **(C)** Expression of each gene was then compared between untreated and polymyxin  
916 B conditions for each strain. Significance was determined by comparing the wild-type strain with  
917 the mutant and complemented strains with Dunnett's multiple comparisons test. **(D)** FIMO was  
918 utilized to search for ArcA binding boxes from *E. coli* K-12 MG1255 (18) in the promoter regions  
919 of the seven genes evaluated in the expression studies. Sequences that had a *p*-value and *q*-value  
920 at or below 0.05 were considered significant. In the promoters of 6/7 *K. pneumoniae* genes, a  
921 putative ArcA binding sequence was identified. Underlined, red nucleotides were loci not  
922 conserved between *E. coli* and *K. pneumoniae* sequences. Direct repeats within sequences were  
923 labeled based on coordinates of direct repeats within corresponding promoters of *E. coli* genes and  
924 are denoted by blue boxes. *p*-values: \* $\leq$ 0.05, \*\* $\leq$ 0.01, \*\*\* $\leq$ 0.001, NS = not significant

925  
926  
927  
928  
929  
930  
931  
932  
933  
934

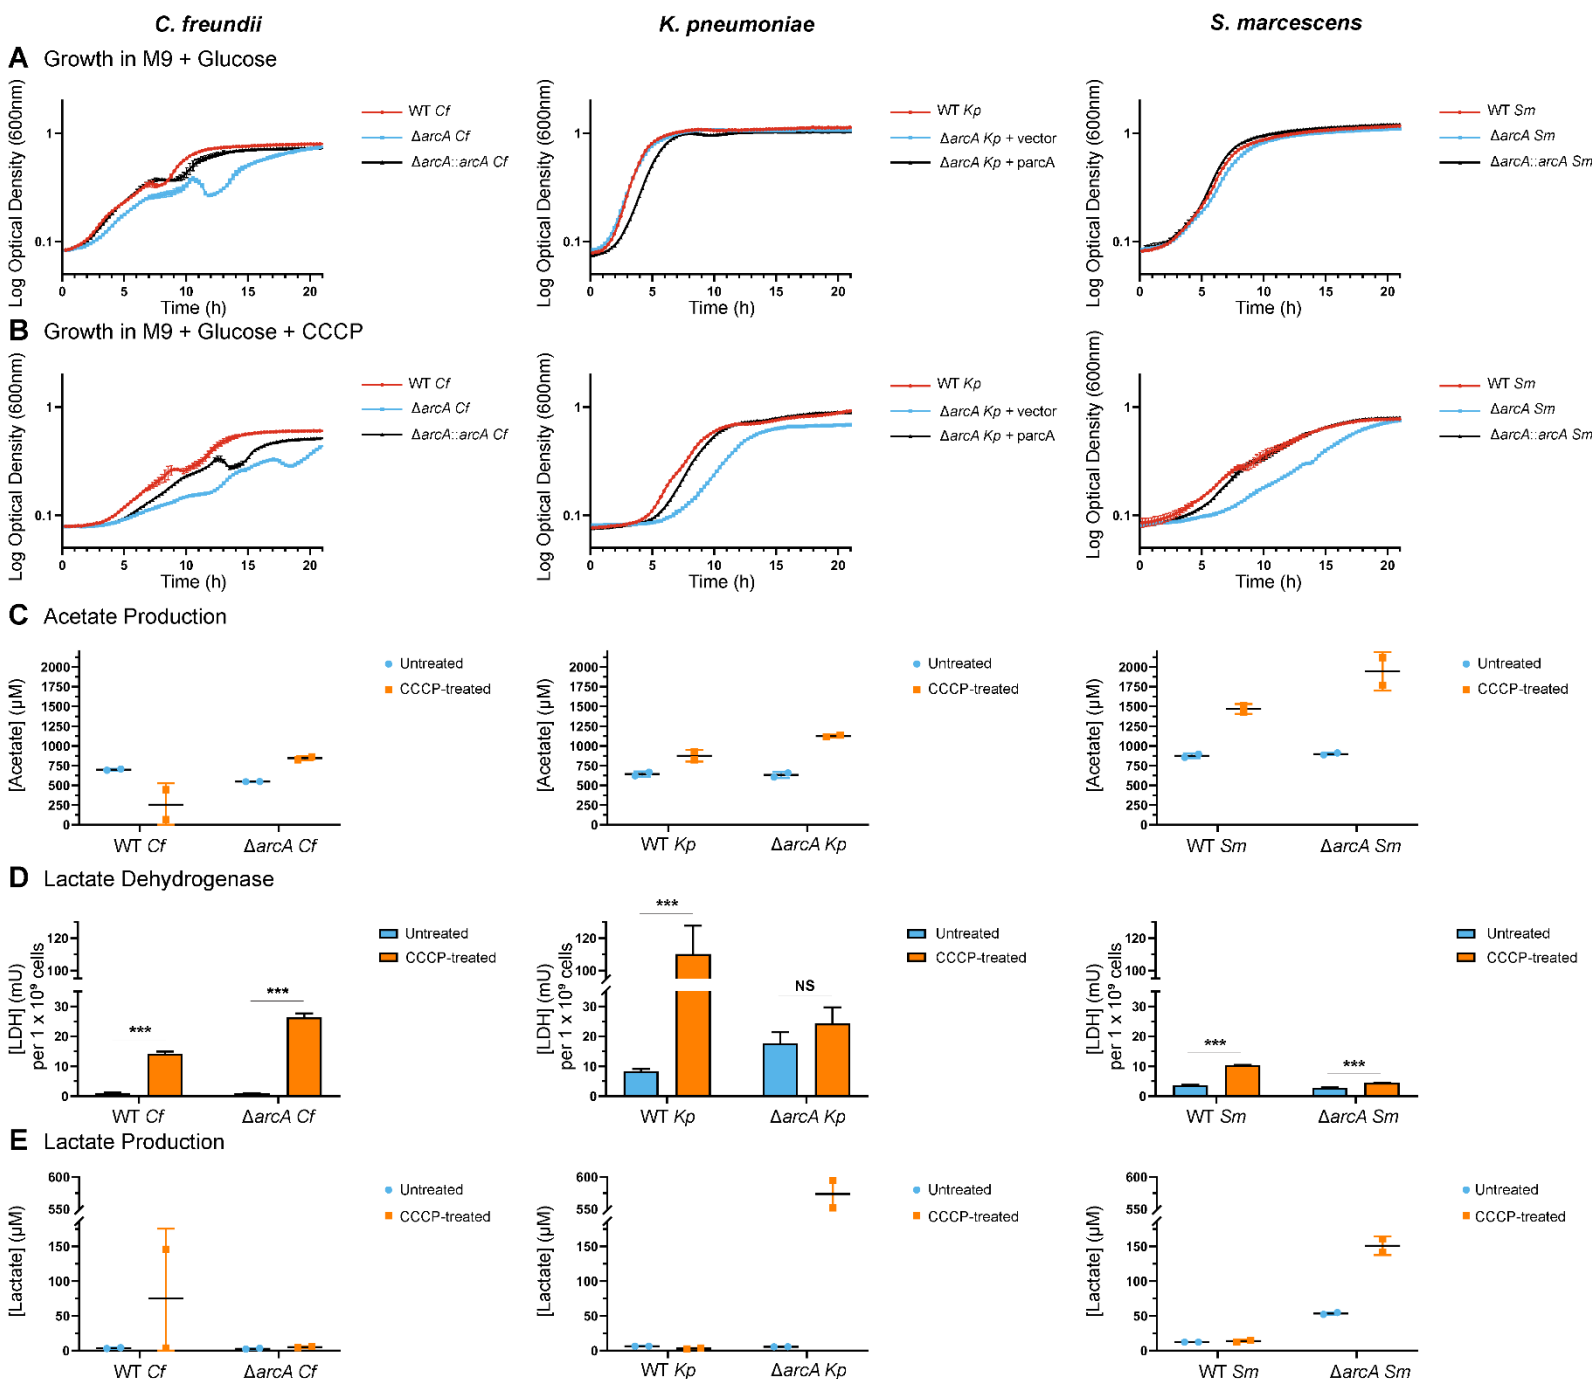

935 **Fig. 7: ArcA modulates metabolism in response to disruption of proton motive force by the**  
 936 **uncoupler carbonylcyanide-m-chlorophenylhydrazine (CCCP).** The ability of wild-type and  
 937  $\Delta arcA$  mutant cells to respond to disruption of ATP synthesis via oxidative phosphorylation  
 938 despite the availability of glucose and oxygen was tested. Overnight cultures incubated aerobically  
 939 in LB were inoculated into M9 minimal medium with 0.4% glucose without (A) or with (B) CCCP  
 940 (*C. freundii*, 15 $\mu$ M CCCP; *K. pneumoniae*, 20 $\mu$ M CCCP; *S. marcescens*, 25 $\mu$ M CCCP). Cultures

941 were incubated at 37°C under aerobic conditions and growth was tracked via OD<sub>600</sub> by a plate  
942 reader every 15 minutes. Growth curves are the average of technical triplicates with standard  
943 deviation and are representative of three independent experiments. **(C)** Targeted metabolomics by  
944 LC-MS was utilized to quantitate acetate from supernatants of wild-type and *arcA* mutant cultures  
945 in early exponential phase from the same conditions as the growth curves. The average of two  
946 biological samples with standard deviation are presented in each graph. **(D)** d-Lactate  
947 dehydrogenase (d-LDH) was measured from cell lysates of cultures grown in M9 minimal medium  
948 with 0.4% glucose without or with CCCP at the same concentrations as the growth curve  
949 conditions. d-LDH levels were quantified with Amplite® Fluorimetric D-Lactate Dehydrogenase  
950 Assay Kit (AAT Bioquest) by comparing sample readings to known standards. d-LDH levels were  
951 normalized per  $1 \times 10^9$  cells. The average of three technical replicates with standard deviation is  
952 presented as representative of three independent experiments. LDH levels were compared for  
953 strains in untreated and treated conditions using Šidák's multiple comparisons test to determine  
954 significance. **(E)** Targeted metabolomics was repeated to quantify lactate with the same  
955 experimental set-up as acetate **(C)**. See methodology for details, **Fig. S4** for sampling metrics, and  
956 **Fig. S5** for LC-MS acetate and lactate samples. *p*-values: \* $\leq 0.05$ , \*\* $\leq 0.01$ , \*\*\* $\leq 0.001$ , NS = not  
957 significant

958



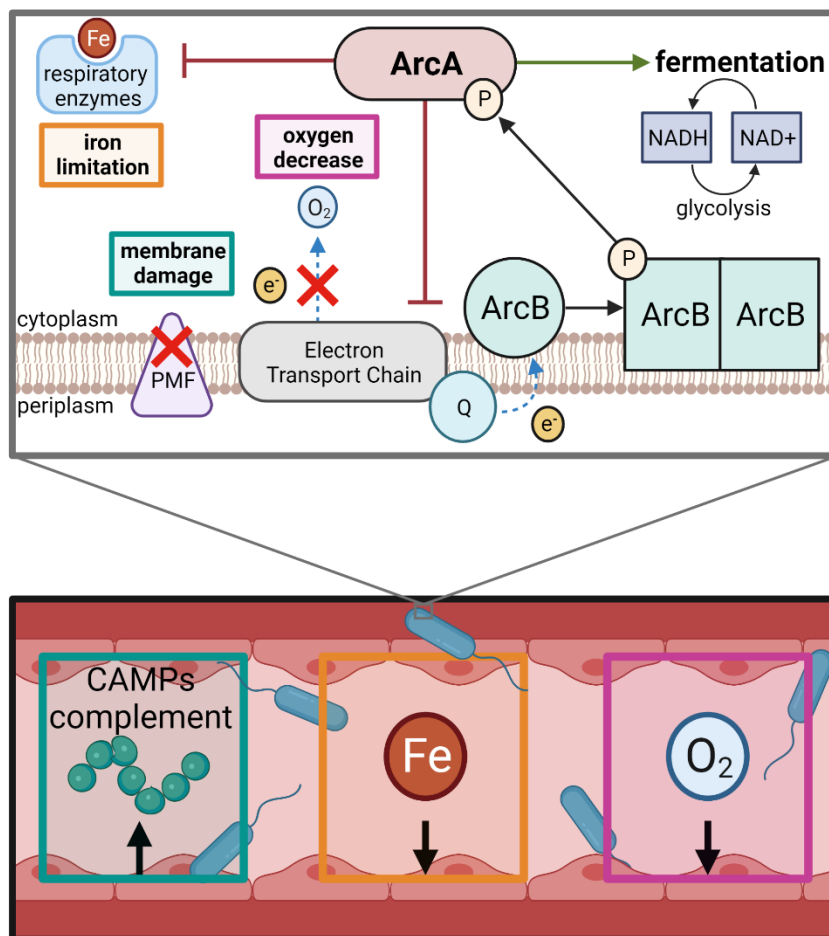

959 **Fig. 8: Response regulator ArcA supports fitness during Gram-negative bacteremia.** Within  
960 the mammalian bloodstream, bacteria encounter decreased iron (Fe) availability, oxygen (O<sub>2</sub>)  
961 levels, and elements of the host immune system such as cationic antimicrobial peptides (CAMPs)  
962 which can cause membrane damage. ArcA mediates the transition to fermentation in response to  
963 such conditions unfavorable for respiration including the inability to maintain a proton motive  
964 force (PMF). Quinones (Q) of the electron transport chain transfer electrons to sensor kinase ArcB  
965 instead of to pathways which lead to oxygen as the terminal electron acceptor. ArcB then  
966 phosphorylates and activates ArcA in response to decreased electron transport chain activity,  
967 providing a mechanism by which ArcA can respond to multiple stimuli impacting metabolic  
968 activity within the cell.  
969
